# Supplementary material
Source: publisher figshare collection journal article supplement (https://acs.figshare.com/ndownloader/files/5098588)

# Strategies for the Generation of Molecularly Imprinted Polymeric Nitroxide Catalysts

**Christopher D. Anderson, Kenneth J. Shea\* and Scott D. Rychnovsky\***

*Department of Chemistry, 516 Rowland Hall, University of California, Irvine, CA 92697-2025*

*srychnov@uci.edu*

## Table of Contents

---

|    |                              |         |
|----|------------------------------|---------|
| A. | General Experimental Details | S2      |
| B. | Template Synthesis           | S3–S15  |
| C. | Polymerization               | S16–S17 |
| D. | Oxidation Chemistry          | S18     |
| E. | Representative EPR Spectra   | S19     |
| F. | NMR Spectra                  | S20–S52 |

**A. General Experimental Details:** IR spectra were recorded on a MIDAC Prospect FT-IR spectrometer.  $^1\text{H}$  NMR were recorded at 500 and 400 MHz and  $^{13}\text{C}$  spectra were recorded at 125 and 100 MHz on Bruker instruments.  $^1\text{H}$  NMR and  $^{13}\text{C}$  chemical shifts are reported as  $\delta$  values in ppm relative to TMS.  $^1\text{H}$  NMR coupling constants are reported in hertz and refer to apparent multiplicities and not true coupling constants. Multiplicity is indicated as follows: s (singlet), d (doublet), t (triplet), q (quartet), m (multiplet), dd (doublet of doublets), etc. EPR spectra were obtained using Bruker instruments at ambient temperature. Optical rotations were determined on a JASCO DIP-370 digital polarimeter; concentration  $c$  is reported as g/100 mL. Combustion analyses were performed by M-H-W laboratories, Phoenix, AZ. Mass spectra were determined on an Fisons autospec spectrometer or a Micromass LCT electrospray mass spectrometer. Tetrahydrofuran (THF),  $\text{Et}_2\text{O}$  and  $\text{CH}_2\text{Cl}_2$  were dried by filtration through alumina according to the procedure described by Grubbs.<sup>1</sup> Pyridine and triethyl amine were distilled from KOH. Liquid chromatography was performed using forced flow (flash chromatography) of the indicated solvent system on Sorbent Technologies silica gel (230-450 mesh).<sup>2</sup> Moisture sensitive reactions were carried out under an atmosphere of argon using oven or flame dried glassware and standard syringe/septa techniques.

---

<sup>1</sup> Pangborn, A. B.; Giardello, M. A.; Grubbs, R. H.; Rosen, R. K.; Timmers, F. J. *Organometallics* **1996**, *15*, 1518–1520.

<sup>2</sup> Still, W. C.; Kahn, M.; Mitra, A. *J. Org. Chem.* **1978**, *43*, 2923–2925.

**B. Template Synthesis**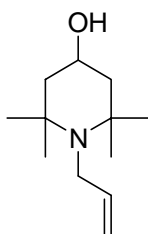

**4-Hydroxy-1-(2-propenyl)-2,2,6,6-tetramethylpiperidine (S1).** To a mixture of 4-hydroxy-2,2,6,6-tetramethylpiperidine (5.0 g, 39 mmol) and toluene (13 mL) in a heavy-walled tube was added allyl bromide (1.59 mL, 19.6 mmol). The tube was sealed and placed in a 130 °C oil bath for 46 h. The resultant mixture was cooled to ambient temperature, diluted with hexanes (10 mL) and was purified by flash chromatography (SiO<sub>2</sub>, 20:80 ethyl acetate:hexanes) to yield 2.8 g (73% yield) of **S1** as a white solid. m.p. 89–90 °C; <sup>1</sup>H NMR (500 MHz, CDCl<sub>3</sub>) 5.79–5.88 (m, 1 H), 5.12–5.16 (m, 1 H), 4.91–4.95 (m, 1 H), 3.94–4.00 (m, 1 H), 3.13–3.14 (m, 2 H), 1.82 (dd, *J* = 4.1, 12.1, 2 H), 1.36 (t, *J* = 11.5, 2 H), 1.08 (s, 6 H), 1.04 (s, 6 H); <sup>13</sup>C NMR (125 MHz, CDCl<sub>3</sub>) 143.3, 113.2, 64.5, 56.6, 50.6, 46.4, 34.4, 22.7; IR (film) 3290 (br), 2932, 1458, 1036 cm<sup>-1</sup>; HRMS (CI/NH<sub>3</sub>) Calcd for C<sub>12</sub>H<sub>23</sub>NO (M<sup>+</sup>) 197.1775, Found: 197.1780; Anal. Calcd for C<sub>12</sub>H<sub>23</sub>NO: C, 73.04; H, 11.75; N, 7.10. Found: C, 73.20; H, 11.76; N, 7.29.

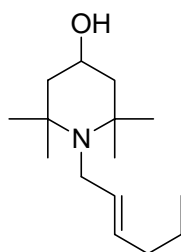

**4-Hydroxy-1-(*E*-2-hexenyl)-2,2,6,6-tetramethylpiperidine (7).** To a mixture of 4-hydroxy-2,2,6,6-tetramethylpiperidine (3.5 g, 22 mmol) and toluene (5 mL) in a heavy-walled tube was added *E*-1-bromo-2-hexene (1.8 g, 11 mmol). The tube was sealed and the reaction mixture heated at 150 °C for 45 h. The black reaction mixture was then cooled to ambient temperature and purified by flash chromatography (SiO<sub>2</sub>, 20:80 ethyl acetate:hexanes → 30:70 ethyl

acetate:hexanes) to yield 1.7 g (53% yield) of **7** as a light yellow oil.  $^1\text{H}$  NMR (500 MHz,  $\text{CDCl}_3$ ) 5.36–5.48 (m, 2 H), 3.95 (tdt,  $J = 4.2, 5.5, 11.5$ , 1 H), 3.07 (d,  $J = 4.5$ , 1 H), 1.94 (dt,  $J = 6.4, 6.8$ , 2 H), 1.77–1.82 (m, 2 H), 1.31–1.41 (m, 5 H), 1.08 (s, 6 H), 1.02 (s, 6 H), 0.86 (t,  $J = 7.4$ , 3 H);  $^{13}\text{C}$  NMR (125 MHz,  $\text{CDCl}_3$ ) 134.4, 128.8, 64.0, 56.1, 50.1, 45.3, 34.4, 34.1, 22.6, 22.2, 13.7; IR (film) 3337 (br), 2963, 1462  $\text{cm}^{-1}$ ; HRMS (CI/ $\text{NH}_3$ ) calcd for  $\text{C}_{15}\text{H}_{29}\text{NO}$  ( $\text{M}^+$ ) 239.2249, found: 239.2251.

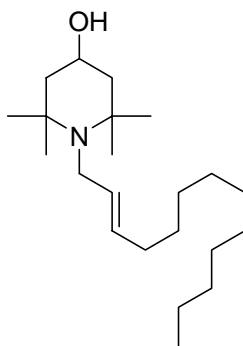

**4-Hydroxy-1-(*E*-2-tridecenyl)-2,2,6,6-tetramethylpiperidine (S2).** To a solution of *E*-1-bromo-2-tridecene (4.2 g, 16 mmol) in toluene (125 mL) was added 4-hydroxy-2,2,6,6-tetramethylpiperidine (5.5 g, 35 mmol). The mixture was heated at reflux for 8 d. The reaction mixture was cooled to ambient temperature, diluted with saturated aqueous  $\text{NaHCO}_3$  (50 mL) and then extracted with ethyl acetate ( $3 \times 25$  mL). The combined organics were dried over  $\text{Na}_2\text{SO}_4$  and concentrated under reduced pressure. The residue was purified by flash chromatography ( $\text{SiO}_2$ , 15:85 ethyl acetate:hexanes) to yield 2.8 g (51%) **S2** as an off-white solid. mp 45–47  $^\circ\text{C}$ ;  $^1\text{H}$  NMR (500 MHz,  $\text{CDCl}_3$ ) 5.34–5.46 (m, 2 H), 3.89–3.97 (m, 1 H), 3.05 (d,  $J = 4.7$ , 2 H), 1.91–1.97 (m, 2 H), 1.78 (dd,  $J = 4.0, 12.1$ , 2 H), 1.20–1.37 (m, 19 H), 1.07 (s, 6 H), 1.01 (s, 6 H), 0.86 (t,  $J = 6.9$ , 3 H);  $^{13}\text{C}$  NMR (125 MHz,  $\text{CDCl}_3$ ) 134.1, 129.0, 63.8, 56.0, 50.0, 45.2, 34.1, 32.3, 31.9, 29.59, 29.56, 29.50, 29.46, 29.3, 29.1, 22.6, 22.1, 14.1; IR (film) 3336 (br), 2925, 1462  $\text{cm}^{-1}$ ; HRMS (ESI) calcd for  $\text{C}_{22}\text{H}_{44}\text{NO}$  ( $\text{M} + \text{H}^+$ ) 338.3423, found: 338.2430.

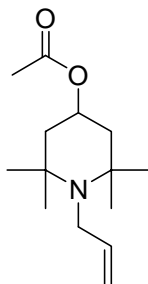

**4-Acetoxy-1-(2-propenyl)-2,2,6,6-tetramethylpiperidine (3a).** To a solution of amine **S1** (555 mg, 2.81 mmol) and pyridine (455  $\mu$ L, 5.62 mmol) in  $\text{CH}_2\text{Cl}_2$  (5 mL) was added  $\text{Ac}_2\text{O}$  (530  $\mu$ L, 5.6 mmol). The resultant solution was maintained at ambient temperature for 15 h. After this period, the excess reagents were quenched by the addition of saturated aqueous  $\text{NaHCO}_3$  (5 mL). The mixture was extracted with  $\text{CH}_2\text{Cl}_2$  ( $3 \times 5$  mL). The combined organics were dried over  $\text{Na}_2\text{SO}_4$  and concentrated under reduced pressure. The resultant oil was purified by flash chromatography ( $\text{SiO}_2$ , 10:90 ethyl acetate:hexane) to provide 350 mg (52%) of **3a** as a colorless oil.  $^1\text{H}$  NMR (500 MHz,  $\text{CDCl}_3$ ) 5.83 (tdd,  $J = 5.0, 10.1, 17.1$ , 1 H), 5.11–5.17 (m, 1 H), 5.07 (tt,  $J = 4.1, 11.6$ , 1 H), 4.91–4.95 (m, 1 H), 3.12–3.15 (m, 2 H), 3.02 (s, 3 H), 1.79–1.84 (m, 2 H), 1.47 (t,  $J = 11.6$ , 2 H), 1.079 (s, 6 H), 1.076 (s, 6 H);  $^{13}\text{C}$  (125 MHz,  $\text{CDCl}_3$ ) 142.7, 112.9, 67.7, 56.0, 45.90, 45.85, 33.7, 22.3, 21.5; IR (film) 2968, 1738, 1244  $\text{cm}^{-1}$ ; HRMS (ESI), calcd for  $\text{C}_{14}\text{H}_{26}\text{NO}_2$  ( $\text{M} + \text{H}^+$ ) 240.1964, found: 240.1960.

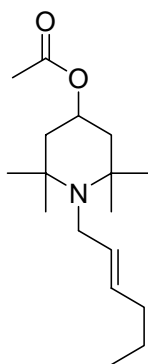

**4-Hydroxy-1-(2-hexenyl)-2,2,6,6-tetramethylpiperidine (3b).** To a solution of amine **7** (103 mg, 0.430 mmol), DMAP (1 mg) and pyridine (70  $\mu$ L, 0.9 mmol) in  $\text{CH}_2\text{Cl}_2$  (2 mL) was added  $\text{Ac}_2\text{O}$  (80  $\mu$ L, 0.9 mmol). The resultant solution was maintained at ambient temperature for 24 h and then the excess reagents were quenched by addition of saturated aqueous  $\text{NaHCO}_3$  (3 mL).

The mixture was extracted with  $\text{CH}_2\text{Cl}_2$  ( $3 \times 10$  mL) and the combined organics were dried over  $\text{Na}_2\text{SO}_4$ . The organic solution was concentrated under reduced pressure and the residue was purified by flash chromatography ( $\text{SiO}_2$ , 5:95 ethyl acetate:hexanes  $\rightarrow$  60:40 ethyl acetate:hexanes) to yield 99 mg (82%) of **3b** as a slightly yellow oil.  $^1\text{H}$  NMR (500 MHz,  $\text{CDCl}_3$ ) 5.35–5.55 (m, 2 H), 5.06 (tt,  $J = 4.1, 11.6$ , 1 H), 3.08 (d,  $J = 4.4$ , 2 H), 2.02 (s, 3 H), 1.95 (dd,  $J = 6.7, 13.4$ , 2 H), 1.76–1.83 (m, 2 H), 1.46 (t,  $J = 11.7$ , 2 H), 1.30–1.41 (m, 2 H), 1.09 (s, 6 H), 1.07 (s, 6 H), 0.87 (t,  $J = 7.4$ , 3 H);  $^{13}\text{C}$  NMR (125 MHz,  $\text{CDCl}_3$ ) 170.7, 134.3, 128.9, 67.8, 56.0, 45.9, 45.2, 34.4, 33.8, 22.6, 22.3, 21.4, 13.6; IR (film) 2965, 1738, 1244  $\text{cm}^{-1}$ ; HRMS (ESI) Calcd for  $\text{C}_{17}\text{H}_{32}\text{NO}_2$  ( $\text{M} + \text{H}^+$ ): 282.2433, Found: 282.2436.

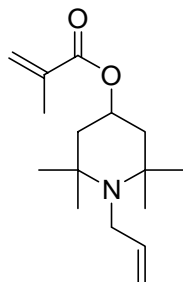

**4-Methacryloyloxy-1-(2-propenyl)-2,2,6,6-tetramethylpiperidine (4a).** To a chilled solution (0 °C) of hydroxylamine **S1** (501 mg, 2.53 mmol), DMAP (1 mg), pyridine (225  $\mu\text{L}$ , 2.78 mmol) in  $\text{CH}_2\text{Cl}_2$  (8 mL) was added methacroyl chloride (260  $\mu\text{L}$ , 2.66 mmol). The solution was allowed to warm to ambient temperature over 17 h. After this period, the excess reagents were quenched by the addition of saturated aqueous  $\text{NaHCO}_3$  (5 mL). The mixture was extracted with  $\text{CH}_2\text{Cl}_2$  ( $3 \times 10$  mL). The combined organics were dried over  $\text{Na}_2\text{SO}_4$  and concentrated under reduced pressure. The resultant oil was purified by flash chromatography ( $\text{SiO}_2$ , 10:90 ethyl acetate:hexane) to provide 440 mg (66%) of **4a** as a colorless oil.  $^1\text{H}$  NMR (500 MHz,  $\text{CDCl}_3$ ) 6.07–6.08 (m, 1 H), 5.84 (tdd,  $J = 5.0, 10.1, 17.1$ , 1 H), 5.52–5.54 (m, 1 H), 5.11–5.18 (m, 2 H), 4.92–4.96 (m, 1 H), 3.15 (td,  $J = 1.8, 4.8$ , 2 H), 1.82–1.94 (m, 5 H), 1.54 (t,  $J = 11.8$ , 2H), 1.10 (s, 6 H), 1.09 (s, 6 H);  $^{13}\text{C}$  NMR (125 MHz,  $\text{CDCl}_3$ ) 167.1, 142.7, 136.8, 125.0, 112.9, 68.1, 56.0,

45.9, 45.8, 33.5, 22.5, 18.3; IR (film) 2968, 1715, 1165  $\text{cm}^{-1}$ ; HRMS (ESI), calcd for  $\text{C}_{16}\text{H}_{28}\text{NO}_2$  ( $\text{M} + \text{H}^+$ ): 266.2120, found: 266.2117.

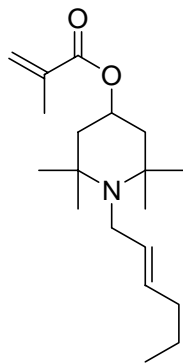

**4-Methacryloyloxy-1-(*E*-2-hexenyl)-2,2,6,6-tetramethylpiperidine (4b).** To a 0 °C solution of alcohol **7** (224 mg, 0.936 mmol),  $\text{NEt}_3$  (391  $\mu\text{L}$ , 2.81 mmol) and DMAP (9 mg) in  $\text{CH}_2\text{Cl}_2$  (3 mL) was added methacrylic acid anhydride (279  $\mu\text{L}$ , 1.87 mmol). The solution was allowed to warm to ambient temperature over 14 h. The excess anhydride was quenched by the addition of saturated aqueous  $\text{NaHCO}_3$  (5 mL). The mixture was extracted with  $\text{CH}_2\text{Cl}_2$  ( $3 \times 5$  mL) and the combined organics were dried over  $\text{Na}_2\text{SO}_4$  and then concentrated under reduced pressure. The residue was purified by flash chromatography ( $\text{SiO}_2$ , 20:80 ethyl acetate:hexanes) to provide 188 mg (66%) of **4b** as a colorless oil.  $^1\text{H}$  NMR (500 MHz,  $\text{CDCl}_3$ ) 6.01 (s, 1 H), 5.53 (t,  $J = 1.53$ , 1 H), 5.36–5.50 (m, 2 H), 5.13 (tt,  $J = 4.2$ , 11.5, 1 H) 3.08 (d,  $J = 4.8$  Hz, 2 H), 1.95 (dd,  $J = 6.9$ , 13.1, 2 H), 1.92 (s, 3 H), 1.84 (dd,  $J = 4.1$ , 12.2, 2 H), 1.53 (t,  $J = 11.6$ , 2 H), 1.31–1.40 (m, 2 H), 1.10 (s, 6 H), 1.09 (s, 6 H), 0.87 (t,  $J = 7.3$ , 3 H);  $^{13}\text{C}$  NMR (125 MHz,  $\text{CDCl}_3$ ) 167.1, 136.8, 134.2, 129.0, 125.0, 68.1, 56.0, 45.8, 45.2, 34.4, 33.7, 22.7, 22.4, 18.3, 13.7; IR (film) 2966, 1716, 1164  $\text{cm}^{-1}$ ; HRMS (ESI), calcd for  $\text{C}_{19}\text{H}_{34}\text{NO}_2$  ( $\text{M} + \text{H}^+$ ) 308.2589, found: 308.2591.

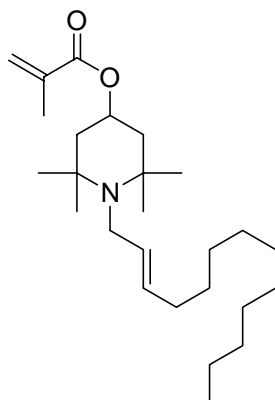

**4-Methacryloyloxy-1-(*E*-2-tridecenyl)-2,2,6,6-tetramethylpiperidine (4c).** To a solution of alcohol **S2** (212 mg, 0.63 mmol), methacrylic acid (67 mg, 0.78 mmol) and DMAP (1 mg) in  $\text{CH}_2\text{Cl}_2$  (5 mL) was added DCC (157 mg, 0.76 mmol). The solution was maintained at ambient temperature for 3 h. The mixture was then concentrated under reduced pressure and the alcohol was dissolved in a solution of 20 % ethyl acetate in hexanes (5 mL) and purified by flash chromatography ( $\text{SiO}_2$ , 20:80 ethyl acetate:hexanes) to provide 204 mg (78%) of **4c** as a slightly yellow oil.  $^1\text{H}$  NMR (500 MHz,  $\text{CDCl}_3$ ) 6.07 (s, 1 H), 5.51–5.54 (m, 1 H), 5.36–5.50 (m, 2 H), 5.14 (tt,  $J = 4.1, 11.5$ , 1 H), 3.09 (d,  $J = 4.4$ , 1 H), 1.94–1.99 (m, 2 H), 1.93 (s, 3 H), 1.82–1.88 (m, 2 H), 1.53 (t,  $J = 11.6$ , 2 H), 1.20–1.36 (m, 17 H), 1.10 (s, 6 H), 1.09 (s, 6 H), 0.88 (t,  $J = 6.9$ , 3 H);  $^{13}\text{C}$  NMR (125 MHz,  $\text{CDCl}_3$ ) 167.1, 136.8, 134.0, 129.2, 125.0, 68.2, 56.0, 45.8, 45.2, 33.7, 32.3, 31.9, 29.63, 29.60, 29.53, 29.50, 29.3, 29.2, 22.7, 22.5, 18.3, 14.1; IR (film) 2925, 1717, 1164  $\text{cm}^{-1}$ ; HRMS (ESI), calcd for  $\text{C}_{26}\text{H}_{48}\text{NO}_2$  ( $\text{M} + \text{H}^+$ ) 406.3685, found: 406.3684.

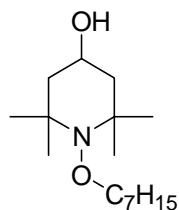

**4-Hydroxy-1-(1-heptoxy)-2,2,6,6-tetramethylpiperidine (S3).** 4-Hydroxy-2,2,6,6-tetramethylpiperinyloxy (720 mg, 4.2 mmol), 1-iodoheptane (690 mL, 4.2 mmol) and tributyl tin hydride (1.1 mL, 4.2 mmol) were dissolved in  $\text{C}_6\text{H}_6$  (50 mL) in a quartz flask. The solution was degassed by three freeze-pump-thaw cycles. The solution was irradiated with a Hanovia UV



utility lamp (low pressure Hg) for 5 h. The mixture was concentrated under reduced pressure and the residue was purified by flash chromatography (SiO<sub>2</sub>, 15:85 ethyl acetate:hexanes) to yield 540 mg (48%) **S3** as a colorless oil. <sup>1</sup>H NMR (500 MHz, CDCl<sub>3</sub>) 3.90–3.98 (m, 1 H), 3.71 (t, *J* = 6.3 Hz, 2 H), 1.79 (d, *J* = 9.5 Hz, 2 H), 1.40–1.55 (m, 4 H), 1.25–1.39 (m, 9 H), 1.18 (s, 6 H), 1.14 (s, 6 H), 0.88 (t, *J* = 7.0 Hz, 3 H); <sup>13</sup>C NMR (125 MHz, C<sub>6</sub>D<sub>6</sub>) 77.7, 63.2, 60.4, 49.0, 33.8, 32.6, 30.2, 29.6, 27.2, 23.4, 21.5, 14.7 ; IR (film) 3359 (br), 2930, 1373, 1047 cm<sup>-1</sup>; HRMS (ESI) calcd for C<sub>16</sub>H<sub>34</sub>O<sub>2</sub>N (M + H<sup>+</sup>) 272.2589, found: 272.2586.

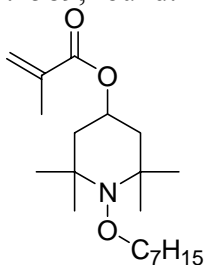

**4-Methacryloyloxy-1-(1-heptoxy)-2,2,6,6-tetramethylpiperidine (9b).** To a solution of alcohol **S3** (245 mg, 0.903 mmol) and DMAP (25 mg) in pyridine (2 mL) was added methacrylic acid anhydride (150 μL, 1.0 mmol). The resultant solution was maintained at ambient temperature for 22 h. The excess reagents were quenched by addition of saturated aqueous NaHCO<sub>3</sub> (3 mL). The mixture was extracted with EtOAc (2 × 5 mL) and the combined organics were washed with 1 M NaHSO<sub>4</sub> (3 × 10 mL). The combined organics were then dried over MgSO<sub>4</sub> and concentrated under reduced pressure. The resulting residue was purified by flash chromatography (SiO<sub>2</sub>, 5:95 ethyl acetate:hexanes) to yield 69 mg (22%) **9b** as a colorless oil. <sup>1</sup>H NMR (500 MHz, CDCl<sub>3</sub>) 6.05 (s, 1 H), 5.52 (s, 1 H), 5.06 (tt, *J* = 4.3, 11.3, 1 H), 3.72 (t, *J* = 6.7, 2 H), 1.91 (s, 3 H), 1.82–1.88 (m, 2 H), 1.58 (t, *J* = 11.9, 2 H), 1.51 (td, *J* = 6.7, 14.3, 2H), 1.24–1.38 (m, 8 H), 1.19 (s, 12 H), 0.88 (t, *J* = 6.9, 3 H); <sup>13</sup>C NMR (125 MHz, CDCl<sub>3</sub>) 167.0, 136.7, 125.1, 77.0, 67.1, 59.9, 44.1, 33.1, 31.8, 29.4, 28.7, 26.4, 22.6, 20.9, 18.2, 14.1; IR (film) 2930, 1718, 1164 cm<sup>-1</sup>; HRMS (ESI), calcd for C<sub>20</sub>H<sub>38</sub>NO<sub>3</sub> (M + H<sup>+</sup>): 340.2852, found: 340.2857.

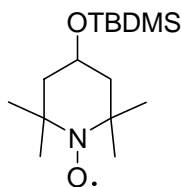

**4-(*tert*-butyldimethylsilyloxy)-2,2,6,6-tetramethylpiperidinyloxy (14).** To a solution of 4-hydroxy-2,2,6,6-tetramethylpiperidinyloxy (8.1 g, 47 mmol) and NEt<sub>3</sub> (6.5 mL, 71 mmol) in CH<sub>2</sub>Cl<sub>2</sub> (100 mL) was added TBDMSCl (8.5 g, 56 mmol). The resultant solution was maintained at ambient temperature for 17h. The reaction mixture was quenched by addition of saturated aqueous NaHCO<sub>3</sub> (50 mL). The mixture was partitioned and the aqueous layer was extracted with CH<sub>2</sub>Cl<sub>2</sub> (3 × 30 mL). The combined organics were dried over Na<sub>2</sub>SO<sub>4</sub> and concentrated under reduced pressure. The resultant oil was purified by flash chromatography (SiO<sub>2</sub>: 20:80 ethyl acetate:hexanes → 65:35 ethyl acetate:hexanes) to yield 5.3 g (65% yield) of 4-hydroxy-2,2,6,6-tetramethylpiperidinyloxy as an orange solid and 4.5 g (33% yield, 97% yield brsm) of nitroxide **14** as a red solid. mp 32–34 °C, IR (film) 2933, 1463, 1254, 1089, 836 cm<sup>-1</sup>; HRMS (ESI) Calcd for C<sub>15</sub>H<sub>32</sub>NO<sub>2</sub>SiNa (M + Na<sup>+</sup>) 309.2100, Found: 309.2104; Anal. Calcd for C<sub>15</sub>H<sub>32</sub>NO<sub>2</sub>Si: C, 62.88; H, 11.26, N, 4.89. Found: C, 63.00; H, 11.07; N, 4.64.

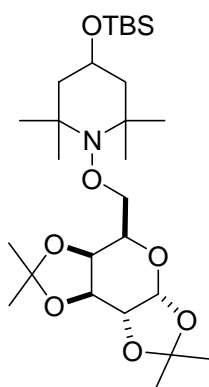

**O-Diisopropylidene-galactose silyloxyhydroxylamine 15.** A solution of 4-(*tert*-butyldimethylsilyloxy)-2,2,6,6-tetramethylpiperidinyloxy (**14**) (1.56 g, 5.42 mmol), tributyltin hydride (870 μL, 4.2 mmol), 5-iodo-diisopropylidene galactose (1.00 g, 2.70 mmol) and benzene (50 mL) in a quartz flask was degassed by four freeze-pump-thaw cycles. The degassed mixture was irradiated by a Hanovia UV utility lamp (low pressure Hg) for 22 h. The reaction mixture

was concentrated under reduced pressure and the residue was purified by flash chromatography (SiO<sub>2</sub>, 4:96 ethyl acetate:hexane) to provide 1.02 g (71%) of **15** as a colorless oil.  $[\alpha]_{23}^D = -42.02$  (*c* 1.04, CHCl<sub>3</sub>); <sup>1</sup>H NMR (500 MHz, CDCl<sub>3</sub>) 5.52 (d, *J* = 4.9, 1 H), 4.58 (dd, *J* = 2.1, 7.9, 1 H), 4.28 (dd, *J* = 2.2, 4.9, 1 H), 4.24 (d, *J* = 7.9, 1 H), 3.84–4.00 (m, 4 H), 1.60–1.67 (m, 2 H), 1.54 (s, 3 H), 1.44–1.54 (m, 2 H), 1.43 (s, 3 H), 1.33 (s, 3 H), 1.32 (s, 3 H), 1.20 (s, 3 H), 1.19 (s, 3 H), 1.13 (s, 3 H), 1.12 (s, 3 H), 0.88 (s, 9 H), 0.05 (s, 6 H); <sup>13</sup>C NMR (125 MHz, CDCl<sub>3</sub>) 109.1, 108.4, 96.3, 75.6, 71.5, 70.8, 70.6, 66.3, 63.9, 60.2, 60.0, 48.5, 33.1, 33.0, 26.1, 26.0, 25.9, 25.0, 24.4, 20.9, 18.2, –4.7 IR (film) 2934, 1378, 1074 cm<sup>–1</sup>; HRMS (ESI) Calcd for C<sub>27</sub>H<sub>51</sub>NO<sub>7</sub>SiNa (M + Na<sup>+</sup>) 552.3333, Found: 552.3344.

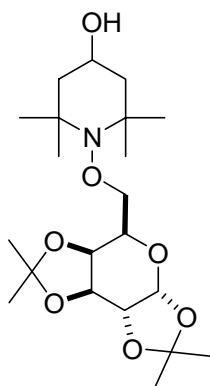

**O-Diisopropylidene-galactose hydroxylamine (S4).** To a chilled (0 °C) solution of hydroxylamine **15** (507 mg, 0.958 mmol) in THF (10 mL) was added a 1.0 M solution of TBAF (1.9 mL, 1.9 mmol) in THF. The solution was allowed to warm to ambient temperature over 3 h. After 3.3 h, the reaction mixture was quenched by the addition of saturated aqueous NaHCO<sub>3</sub> (10 mL). The mixture was extracted with CH<sub>2</sub>Cl<sub>2</sub> (3 × 10 mL). The combined organics were dried over Na<sub>2</sub>SO<sub>4</sub> and concentrated under reduced pressure. The resultant oil was purified by flash chromatography (SiO<sub>2</sub>, 40:60 ethyl acetate:hexane) to provide 355 mg (89%) of **S4** as a white solid. mp 114–116 °C;  $[\alpha]_{23}^D = -61.58$  (*c* 1.01, CHCl<sub>3</sub>); <sup>1</sup>H NMR (500 MHz, C<sub>6</sub>D<sub>6</sub>) 5.51 (d, *J* = 5.0, 1 H), 4.49 (dd, *J* = 2.2, 7.9, 1 H), 4.22–4.28 (m, 2 H), 4.18–4.22 (m, 1 H), 4.16 (dd, *J* = 2.3, 5.0, 1 H), 4.07 (dd, *J* = 1.5, 7.9, 1 H), 3.69–3.79 (m, 1 H), 1.60–1.71 (m, 2 H), 1.40–1.54 (m, 8 H), 1.28–1.32 (m, 7 H), 1.15–1.20 (m, 9 H), 1.06 (s, 3 H); <sup>13</sup>C NMR (125 MHz, C<sub>6</sub>D<sub>6</sub>) 109.6, 108.8, 97.2, 76.9, 72.5, 71.6, 71.5, 67.3, 63.2, 60.8, 60.6, 49.1, 33.8, 33.5, 26.6, 25.4, 24.9, 21.5;

IR (film) 3394 (br), 2978, 1378  $\text{cm}^{-1}$ ; HRMS (ESI) Calcd for  $\text{C}_{21}\text{H}_{37}\text{NO}_7\text{Na}$  ( $\text{M} + \text{Na}^+$ ) 438.2468, Found: 438.2467.

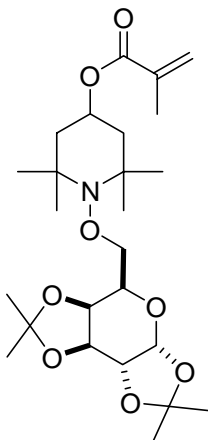

***O*-Diisopropylidene-galactose metacryloyloxyhydroxylamine 16.** To a solution of hydroxylamine **S4** (1.17 g, 2.82 mmol),  $\text{NEt}_3$  (786  $\mu\text{L}$ , 5.64 mmol) and DMAP (1 mg) in  $\text{CH}_2\text{Cl}_2$  (10 mL) was added methacryloyl chloride (386  $\mu\text{L}$ , 3.95 mmol). The resultant solution was maintained for 14 h at ambient temperature and then the excess reagents were quenched by addition of saturated aqueous  $\text{NaHCO}_3$  (10 mL). The mixture was extracted with  $\text{CH}_2\text{Cl}_2$  ( $3 \times 10$  mL). The combined organics were dried over  $\text{Na}_2\text{SO}_4$  and concentrated under reduced pressure. The resultant oil was purified by flash chromatography ( $\text{SiO}_2$ , 10:90 ethyl acetate:hexane) to provide 1.08 g (79%) of **16** as a white solid. mp 83–85  $^\circ\text{C}$ ;  $[\alpha]_D^{23} = -54.87$  ( $c$  0.90,  $\text{CHCl}_3$ );  $^1\text{H}$  NMR (500 MHz,  $\text{C}_6\text{D}_6$ ) 6.16 (s, 1 H), 5.51 (d,  $J = 5.0$ , 1 H), 5.22–5.25 (m, 1 H), 5.20 (td,  $J = 4.3$ , 11.7, 1 H), 4.49 (dd,  $J = 2.3$ , 7.9, 1 H), 4.22–4.25 (m, 2 H), 4.17–4.20 (m, 1 H), 4.17 (dd,  $J = 2.3$ , 7.9, 1 H), 4.05 (dd,  $J = 1.3$ , 7.9, 1 H), 1.88 (s, 3 H), 1.82 (td,  $J = 3.6$ , 12.2, 1 H), 1.78 (td,  $J = 3.6$ , 12.2, 1 H), 1.53–1.62 (m, 2 H), 1.47 (s, 3 H), 1.45 (s, 3 H), 1.25–1.27 (m, 6 H), 1.22 (s, 3 H), 1.21 (s, 3 H), 1.16 (s, 3 H), 1.06 (s, 3 H);  $^{13}\text{C}$  NMR (125 MHz,  $\text{CDCl}_3$ ) 166.9, 137.7, 125.2, 109.6, 108.8, 97.2, 76.9, 72.4, 71.6, 71.5, 67.4, 67.1, 60.8, 60.6, 44.9, 44.8, 33.7, 33.4, 26.6, 25.3, 24.8, 21.3, 21.2, 18.8; IR (film) 2979, 1716, 1379, 1168  $\text{cm}^{-1}$ ; HRMS (ESI) Calcd for  $\text{C}_{25}\text{H}_{42}\text{NO}_8$  ( $\text{M} + \text{H}^+$ ) 484.2910, Found: 484.2913.

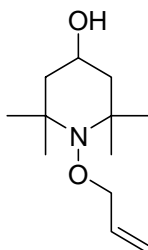

**4-Hydroxy-1-(2-propenoxy)-2,2,6,6-tetramethylpiperidine (S5).** A solution of 4-hydroxy-2,2,6,6-tetramethylpiperidinyloxy (1.00 g, 5.80 mmol), tributyltin hydride (1.56 mL, 5.80 mmol) and allyl bromide (505  $\mu$ L, 5.80 mmol) and benzene (50 mL) in a quartz flask was degassed by three freeze-pump-thaw cycles. The degassed mixture was irradiated by a Hanovia UV utility lamp (low pressure Hg) for 15 h. The reaction mixture was concentrated under reduced pressure and the residue was purified by flash chromatography ( $\text{SiO}_2$ , 6:94 ethyl acetate:hexanes  $\rightarrow$  15:85 ethyl acetate:hexane) to provide 472 mg (38%) of **S5** as a white solid. mp 58–60  $^{\circ}\text{C}$ ;  $^1\text{H}$  NMR (500 MHz,  $\text{CDCl}_3$ ) 5.89 (tdd,  $J = 5.4, 10.7, 17.6$ , 1 H), 5.24–5.30 (m, 1 H), 5.11–5.15 (m, 1 H), 4.27–4.30 (m, 2 H), 3.92–4.00 (m, 1 H), 1.78–1.84 (m, 2 H), 1.58 (br s, 1 H), 1.45 (t,  $J = 11.7$ , 2 H), 1.20 (s, 6 H), 1.16 (s, 6 H);  $^{13}\text{C}$  NMR (125 MHz,  $\text{CDCl}_3$ ) 133.9, 116.2, 78.4, 63.4, 60.0, 48.3, 33.0, 21.0; IR (film) 3267 (br), 2927, 1055  $\text{cm}^{-1}$ ; HRMS (ESI) calcd for  $\text{C}_{12}\text{H}_{24}\text{NO}_2$  ( $\text{M} + \text{H}^+$ ) 214.1807, found: 214.1802.

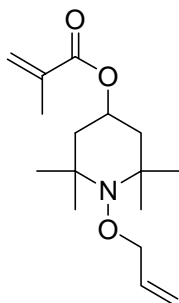

**4-Methacryloyloxy-1-(2-propenoxy)-2,2,6,6-tetramethylpiperidine (17).** To a solution of hydroxylamine **S5** (55 mg, 0.26 mmol), DMAP (1 mg),  $\text{NEt}_3$  (73  $\mu$ L, 0.52 mmol) in  $\text{CH}_2\text{Cl}_2$  (1 mL) was added methacrylic acid anhydride (78  $\mu$ L, 52 mmol). The solution was maintained at ambient temperature for 9 h. After this period, additional  $\text{NEt}_3$  (73  $\mu$ L, 0.52 mmol) and methacrylic acid anhydride (78  $\mu$ L, 52 mmol) was added. The resultant solution was maintained

for 4.5 h and then the excess reagents were quenched by the addition of saturated aqueous  $\text{NaHCO}_3$  (5 mL). The mixture was extracted with  $\text{CH}_2\text{Cl}_2$  ( $3 \times 5$  mL). The combined organics were dried over sodium sulfate and concentrated under reduced pressure. The resultant oil was purified by flash chromatography ( $\text{SiO}_2$ , 5:95 ethyl acetate:hexane) to provide 55 mg (76%) of **17** as colorless oil.  $^1\text{H}$  NMR (500 MHz,  $\text{CDCl}_3$ ) 6.06 (s, 1 H), 5.89 (tdd,  $J = 5.5, 10.7, 17.2$ , 1 H), 5.53 (s, 1 H), 5.28–5.24 (m, 1 H), 5.11–5.15 (m, 1 H), 5.08 (tt,  $J = 4.4, 11.3$ , 1 H), 4.27–4.31 (m, 2 H), 1.92 (s, 3 H), 1.85–1.90 (m, 2 H), 1.59 (t,  $J = 11.9$ , 2 H), 1.22 (s, 12 H);  $^{13}\text{C}$  NMR (125 MHz,  $\text{CDCl}_3$ ) 167.0, 136.6, 133.8, 125.2, 116.2, 78.4, 67.0, 60.0, 44.1, 33.0, 20.9, 18.2; IR (film) 2977, 1718, 1165  $\text{cm}^{-1}$ ; HRMS (ESI) calcd for  $\text{C}_{16}\text{H}_{28}\text{NO}_3$  ( $\text{M} + \text{H}^+$ ) 282.2069, found: 282.2064.

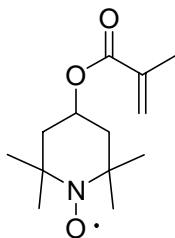

**4-Methacroyl-2,2,6,6-tetramethylpiperidinyloxy (12b).** To a solution of 4-hydroxy-2,2,6,6-tetramethylpiperidinyloxy (100 mg, 0.58 mmol),  $\text{NEt}_3$  (170  $\mu\text{L}$ , 1.16 mmol) and DMAP (1 mg) in  $\text{CH}_2\text{Cl}_2$  (2 mL) was added methacrylic acid anhydride (172  $\mu\text{L}$ , 1.16 mmol). The resulting solution was maintained at ambient temperature for 9 h. After this period, additional  $\text{NEt}_3$  (170  $\mu\text{L}$ , 0.52 mmol) and methacrylic acid anhydride (172  $\mu\text{L}$ , 1.16 mmol) was added. The resulting solution was maintained at ambient temperature for 4.5 h and then the excess reagents were quenched by addition of saturated aqueous  $\text{NaHCO}_3$  (5 mL). The mixture was extracted with  $\text{CH}_2\text{Cl}_2$  ( $3 \times 10$  mL). The combined organics were dried over  $\text{Na}_2\text{SO}_4$  and concentrated under reduced pressure. The resultant oil was purified by flash chromatography ( $\text{SiO}_2$ , 5:95 ethyl acetate:hexane) to provide 125 mg (90%) of **12b** as a pink solid. mp 86–87  $^\circ\text{C}$ , HRMS (ESI) Calcd for  $\text{C}_{13}\text{H}_{22}\text{NO}_3\text{Na}$  ( $\text{M} + \text{Na}^+$ ) 263.1497, Found: 263.1492; Anal. Calcd for  $\text{C}_{13}\text{H}_{22}\text{NO}_3$ : C, 64.97; H, 9.23; N, 5.83. Found: C, 64.79; H, 9.01; N, 5.62.

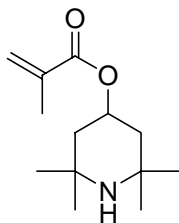

**4-Methacryloyloxy-2,2,6,6-tetramethylpiperidine (S6).** To a solution of 4-hydroxy-2,2,6,6-tetramethylpiperidine ( 2.14 g, 13.6 mmol), DMAP (166 mg, 1.36 mmol) and pyridine (1.43 mL, 17.7 mmol) in CH<sub>2</sub>Cl<sub>2</sub> (30 mL) was added methacrylic acid anhydride (2.43 mL, 16.3 mmol). The solution was maintained at ambient temperature for 12 h and then the excess reagents were quenched by the addition of saturated aqueous NaHCO<sub>3</sub> (15 mL). The mixture was extracted with CH<sub>2</sub>Cl<sub>2</sub> (3 × 15 mL). The combined organics were dried over Na<sub>2</sub>SO<sub>4</sub> and concentrated under reduced pressure. The resultant oil was purified by flash chromatography (SiO<sub>2</sub>, 20:80 ethyl acetate:hexane) to provide 1.32 mg (43 %) of **S6** as white solid. mp 60–62 °C; <sup>1</sup>H NMR (500 MHz, CDCl<sub>3</sub>) 6.08 (s, 1 H), 5.53–5.55 (m, 1 H), 5.25 (tt, *J* = 4.2, 11.3, 1 H), 1.92–1.98 (m, 5 H), 1.25 (s, 6 H), 1.20 (t, *J* = 11.9, 2 H), 1.16 (s, 6 H); <sup>13</sup>C NMR (125 MHz, CDCl<sub>3</sub>) 167.0, 136.8, 125.0, 69.1, 51.4, 43.8, 34.8, 29.1, 18.3; IR (film) 3312 (br), 2969, 1702, 1633, 1165 cm<sup>-1</sup>; Anal. Calcd for C<sub>13</sub>H<sub>23</sub>NO<sub>2</sub>: C, 69.29; H, 10.29; N, 6.22. Found: C, 69.50; H, 10.21; N, 6.09.

### **C. Polymerizations**

#### **General Procedure for Polymerization. Preparation of hexenylamine template copolymer**

**S7.** Ethylene glycol dimethacrylate (1.84 mL, 9.76 mmol, 0.8 equiv), methyl methacrylate (182  $\mu$ L, 1.71 mmol, 0.14 equiv), amine **4b** (188 mg, 0.61 mmol, 0.05 equiv), AIBN (20 mg, 0.1 mmol, 0.01 equiv) and CH<sub>3</sub>CN (2.25 mL) were combined in a 20 mL vial. The solution was degassed for 5 min with argon and then sealed and placed in an 80 °C oil bath for 40 h. After cooling to ambient temperature, the solid was crushed and placed in a Soxhlet extractor and extracted with MeOH for 24 h. The solid was then dried under vacuum to provide 3.73 g of polymer **S7**.

Blank Polymer **S8**: Following the general experimental amine **S6** (225 mg, 1.00 mmol) was processed to provide 3.16 g of amino polymer **S8**.

Allyl Polymer **S9**: Following the general experimental amine **4a** (265 mg, 1.00 mmol) was processed to provide 3.73 g of amino polymer **S9**.

Tridecenyl Polymer **S10**: Following the general experimental amine **4c** (406 mg, 1.00 mmol) was processed to provide 3.81 g of amino polymer **S10**.

Diisopropylidene Galactose Polymer **S11**: Following the general experimental amine **16** (200 mg, 0.41 mmol) was processed to provide 1.63 g of amino polymer **S11**.

*O*-Heptyl Polymer **S12**: Following the general experimental amine **9b** (118 mg, 0.35 mmol) was processed to provide 1.32 g of amino polymer **S12**.

*O*-Allyl Polymer **S13**: Following the general experimental amine **17** (272 mg, 0.98 mmol) was processed to provide 2.78 g of amino polymer **S13**.



**General Procedure for the Generation of Nitroxide Containing Polymers. Preparation of hexenylamine templated nitroxide polymer S14.** To a suspension of polymer **S7** (2.03 g) in CH<sub>2</sub>Cl<sub>2</sub> (10 mL) was added *m*-CPBA (0.986 g, 5.71 mmol). The mixture was allowed to stand for 18 h and then filtered and washed with CH<sub>2</sub>Cl<sub>2</sub> (3 × 10 mL). The resulting pink solid was placed in a Soxhlet extractor and extracted with MeOH for 24 h. The solid was dried under vacuum to provide 2.53 g of templated nitroxide polymer **S14** as a pink solid.

Blank Nitroxide Polymer **S15**: Following the general experimental, polymer **S8** (2.93 g) was converted to polymer **S15** (3.12 g).

Allyl Templated Polymer **S16**: Following the general experimental, polymer **S9** (3.54 g) was converted to polymer **S16** (3.12 g).

Tridecenyl Templated Polymer **S17**: Following the general experimental, polymer **S10** (3.64 g) was converted to polymer **S17** (4.35 g).

Galactose Templated Polymer **S18**: Following the general experimental, polymer **S11** (1.55 g) was converted to polymer **S18** (1.50 g)

*O*-Heptyl Templated Polymer **S19**: Following the general experimental, polymer **S12** (1.00 g) was converted to polymer **S19** (1.00 g).

*O*-Allyl Templated Polymer **S20**: Following the general experimental, polymer **S13** (0.96 g) was converted to polymer **S20** (0.99 g)

**D. Oxidation Chemistry**

**Table 1, Entry 1: Benzaldehyde.** Following the general experimental (see text, Ref. 21), benzyl alcohol (66 mg) was converted to benzaldehyde (52 mg, 80 % yield). Data are in agreement with literature values.<sup>3</sup>

**Table 1, Entry 2: Phenyl Ethyl Ketone.** Following the general experimental (see text, Ref. 21), 1-phenylpropan-1-ol (83 mg) was converted to phenyl ethyl ketone (62 mg, 76 % yield). Data are in agreement with literature values.<sup>4</sup>

**Table 1, Entry 3: Decanal.** Following the general experimental (see text, Ref. 21), 1-decanol (100 mg) was converted to Decanal (79 mg, 80 % yield). Data are in agreement with literature values.<sup>5</sup>

**Table 1, Entry 4: 5-Phenyl Pentanal.** See References 21–22 in the text.

**Table 1, Entry 5: 2-Methyl-Dodecanal.** Following the general experimental (see text, Ref. 21), 2-methyl-1-dodecanol (50 mg) was converted to 2-methyl-dodecanal (33 mg, 68 % yield). Data are in agreement with literature values.<sup>6</sup>

---

<sup>3</sup> Abraham, R. J.; Chadwick, D. J.; Sancassan, F. *Tetrahedron* **1982**, 38, 1485–1492.

<sup>4</sup> Wang, D.; Zhang, Z. *Org. Lett.* **2003**, 5, 4645–4648.

<sup>5</sup> Velusamy, S.; Punniyamurthy, T. *Org. Lett.* **2004**, 6, 217–220.

<sup>6</sup> Fischli, A. *Helv. Chim. Acta* **1978**, 61, 2560–2578.

**E. Representative EPR Spectra**Polymer **S11** (prior to oxidation)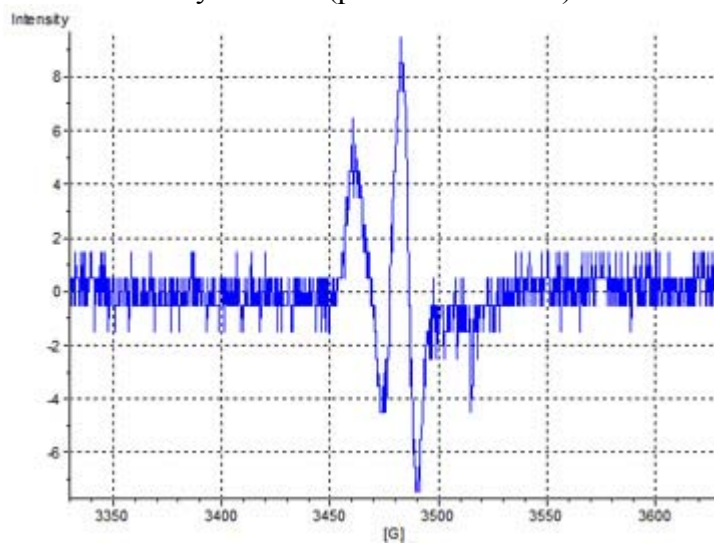Polymer **S18**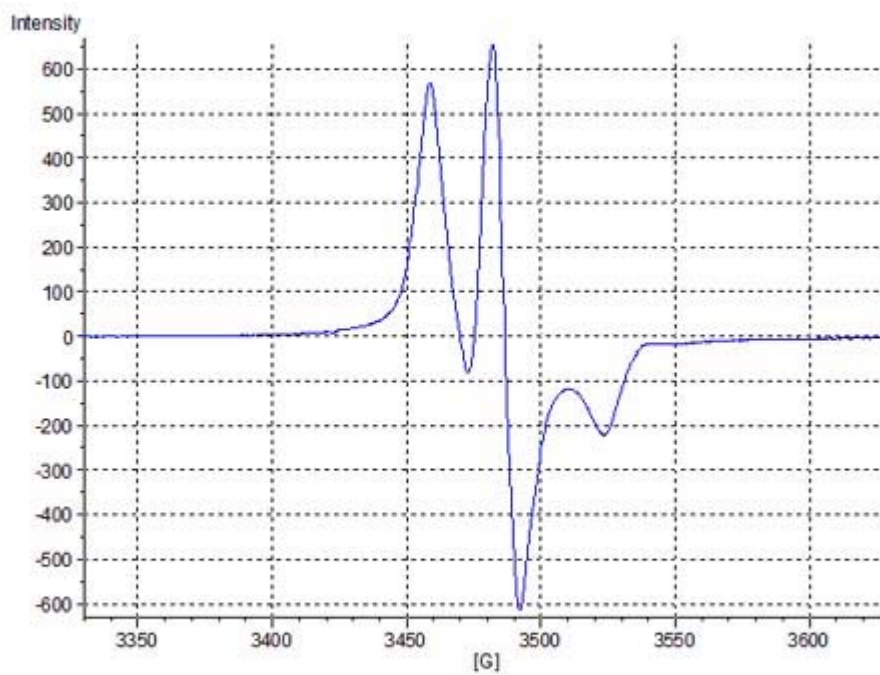

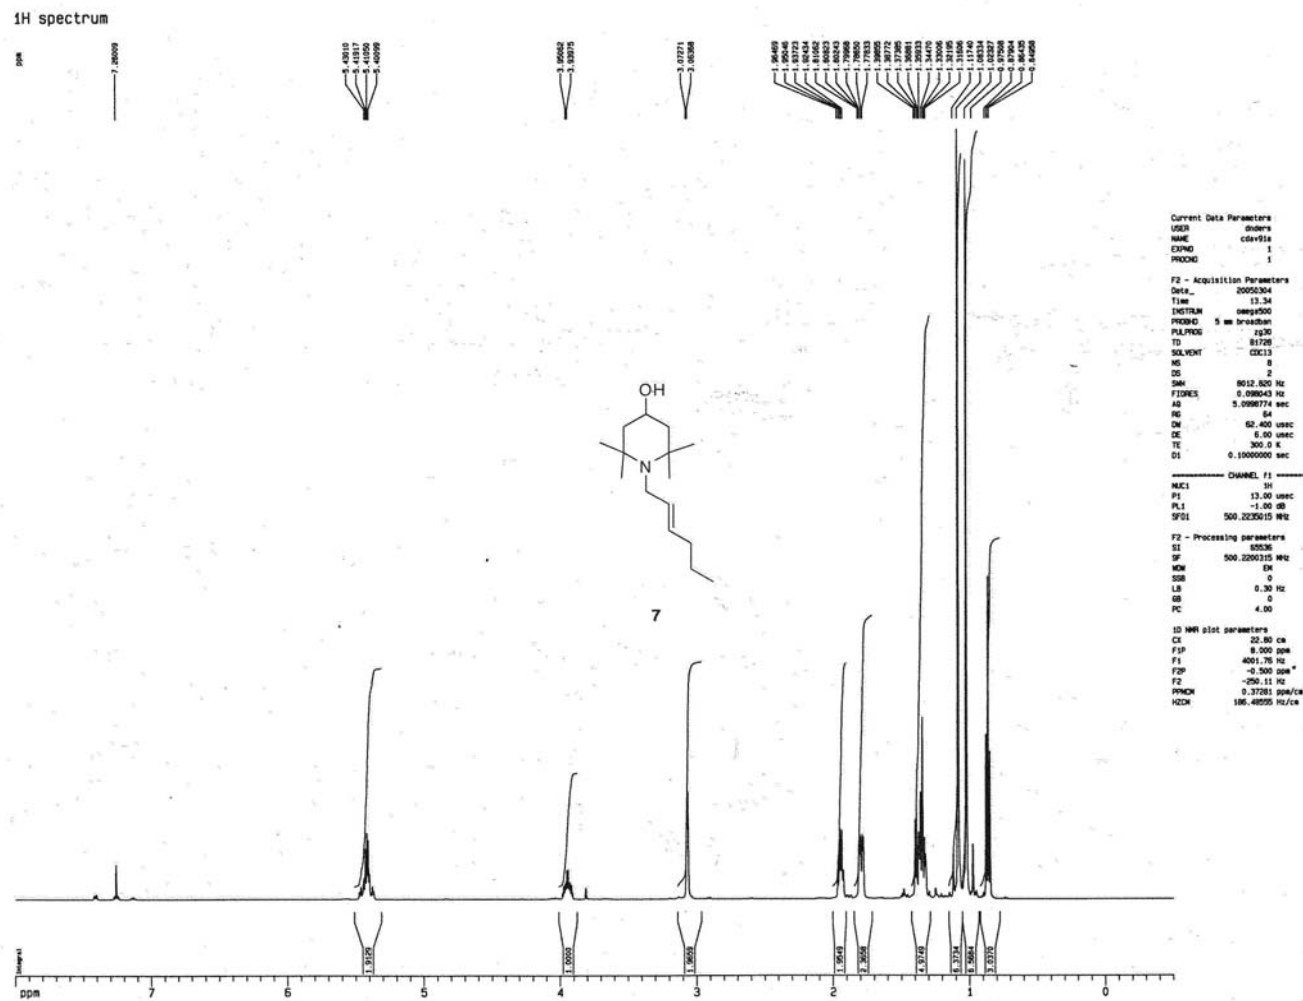

<sup>13</sup>C spectrum with <sup>1</sup>H decoupling

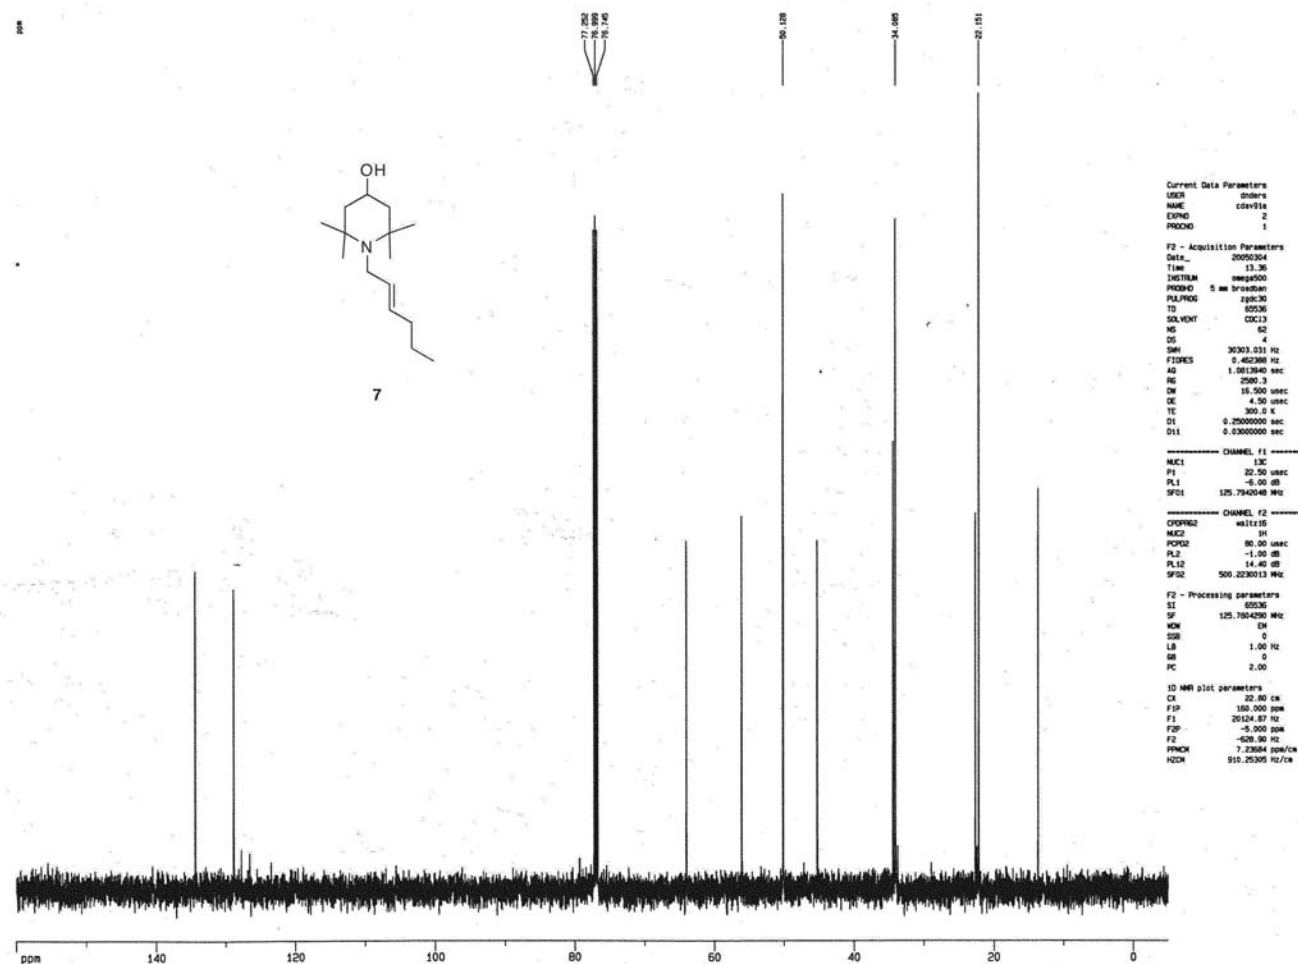

1H spectrum

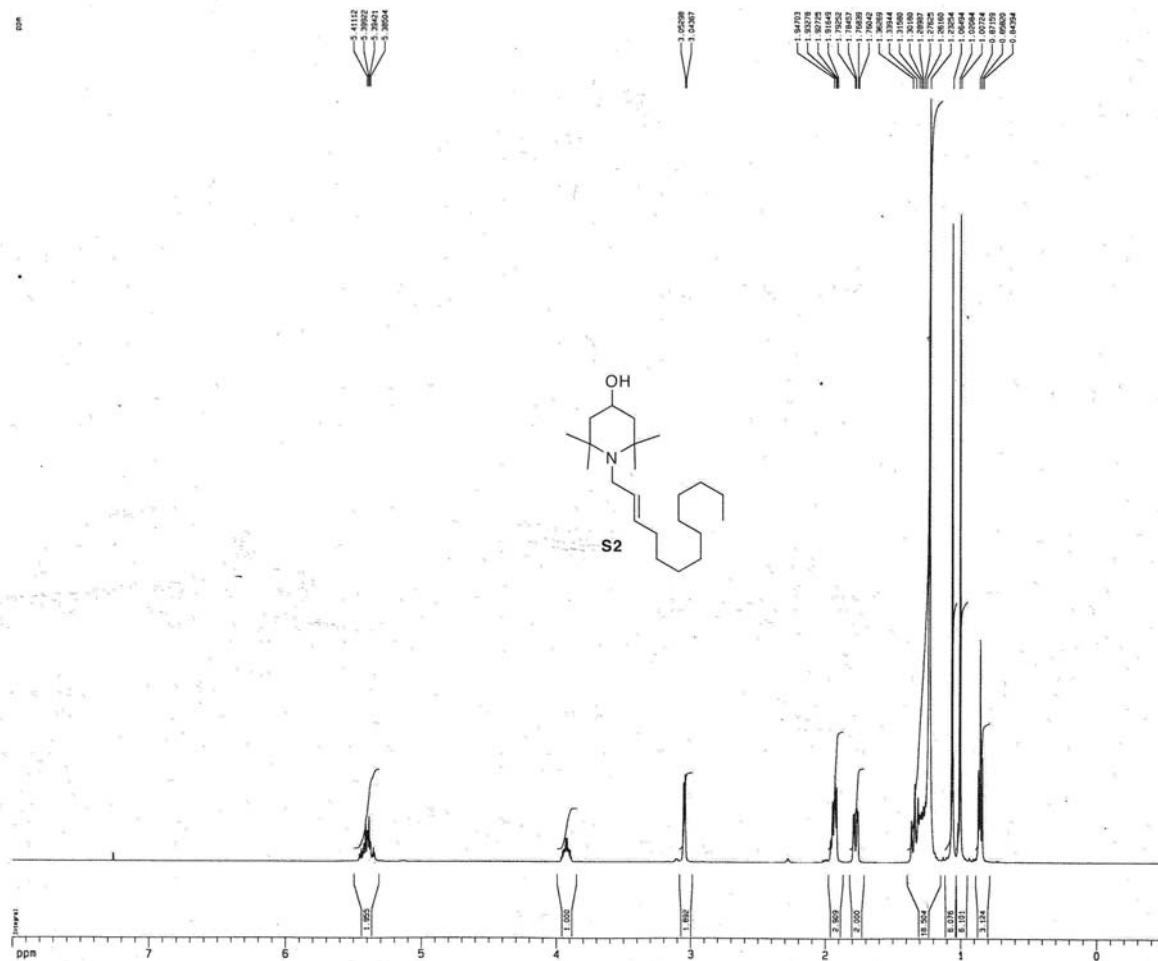

Current Data Parameters  
USER anders  
NAME cdevis  
EXPNO 1  
PROCNO 1

F2 - Acquisition Parameters  
Date\_ 20050302  
Time 15.02  
INSTRUM oemag500  
PROBHD 5 mm broadband  
PULPROG zgpg30  
TD 65536  
SOLVENT CDCl3  
NS 8  
DS 2  
SWH 8012.800 Hz  
FIDRES 0.08843 Hz  
AQ 5.0988774 sec  
RG 62  
DM 62.400 usec  
DE 8.00 usec  
TE 300.2 K  
D1 0.1000000 sec

\*\*\*\*\* CHANNEL f1 \*\*\*\*\*  
NUC1 1H  
P1 13.00 usec  
PL1 -1.00 dB  
SFO1 500.225015 MHz

F2 - Processing parameters  
SI 65536  
SF 500.225015 MHz  
WDW EM  
SSB 0  
LB 0.30 Hz  
GB 0  
PC 4.00

1D NMR plot parameters  
CX 22.80 cm  
FID 0.000 usec  
P1 4001.76 Hz  
FDP -0.500 usec  
F2 -250.11 Hz  
PCNCH 0.37081 ppm/cm  
PCW 186.48555 Hz/cm

<sup>13</sup>C spectrum with <sup>1</sup>H decoupling

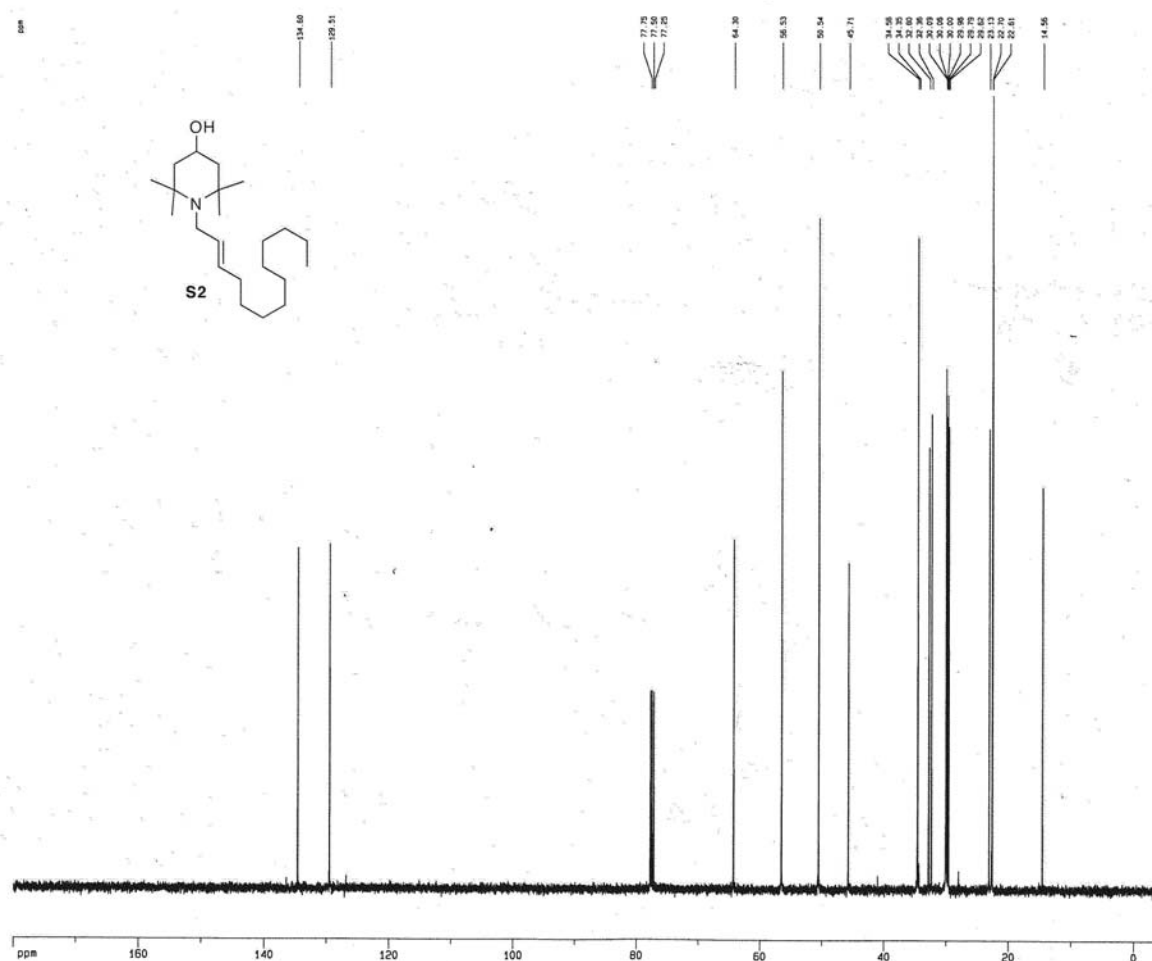

Current Data Parameters  
USER anders  
NAME cdev90e  
EXPNO 2  
PROCNO 1

F2 - Acquisition Parameters  
Date\_ 20050302  
Time 15.04  
INSTRUM specto00  
PROBHD 5 mm broadband  
PULPROG zgpg30  
TD 65536  
SOLVENT CDCl3  
NS 128  
DS 4  
SWH 30303.031 Hz  
FIDRES 0.462388 Hz  
AQ 1.0813940 sec  
RG 5180.8  
DW 16.505 usec  
DE 4.50 usec  
TE 300.2 K  
D1 0.25000000 sec  
D11 0.03000000 sec

\*\*\*\*\* CHANNEL f1 \*\*\*\*\*  
NUC1 <sup>13</sup>C  
P1 20.50 usec  
PL1 -6.00 dB  
SFO1 125.7642048 MHz

\*\*\*\*\* CHANNEL f2 \*\*\*\*\*  
CPROG2 waltz16  
NUC2 <sup>1</sup>H  
PCPD2 80.00 usec  
PL2 -1.00 dB  
PL12 14.40 dB  
SFO2 500.2230113 MHz

F2 - Processing parameters  
S1 65536  
SF 125.7603500 MHz  
WDW EM  
SSB 0  
LB 1.00 Hz  
GB 0  
PC 2.00

1D NMR plot parameters  
CX 22.90 cm  
F1P 180.000 ppm  
F1 20540.47 Hz  
F2P -5.000 ppm  
F2 -628.90 Hz  
PCHN 8.11404 ppm/cm  
HCK 1000.58038 Hz/cm

<sup>1</sup>H spectrum

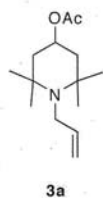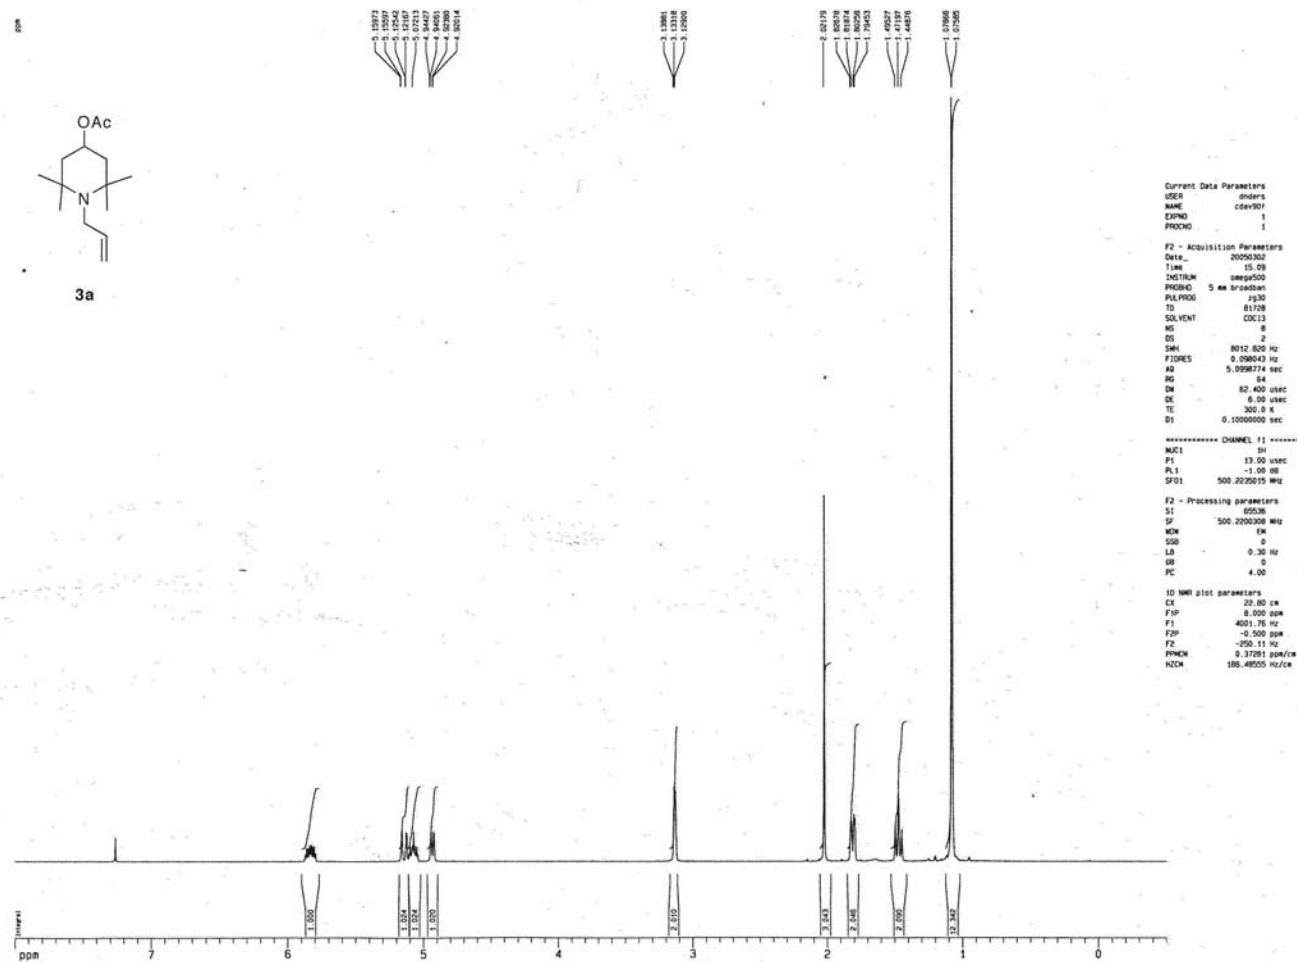



<sup>13</sup>C spectrum with <sup>1</sup>H decoupling

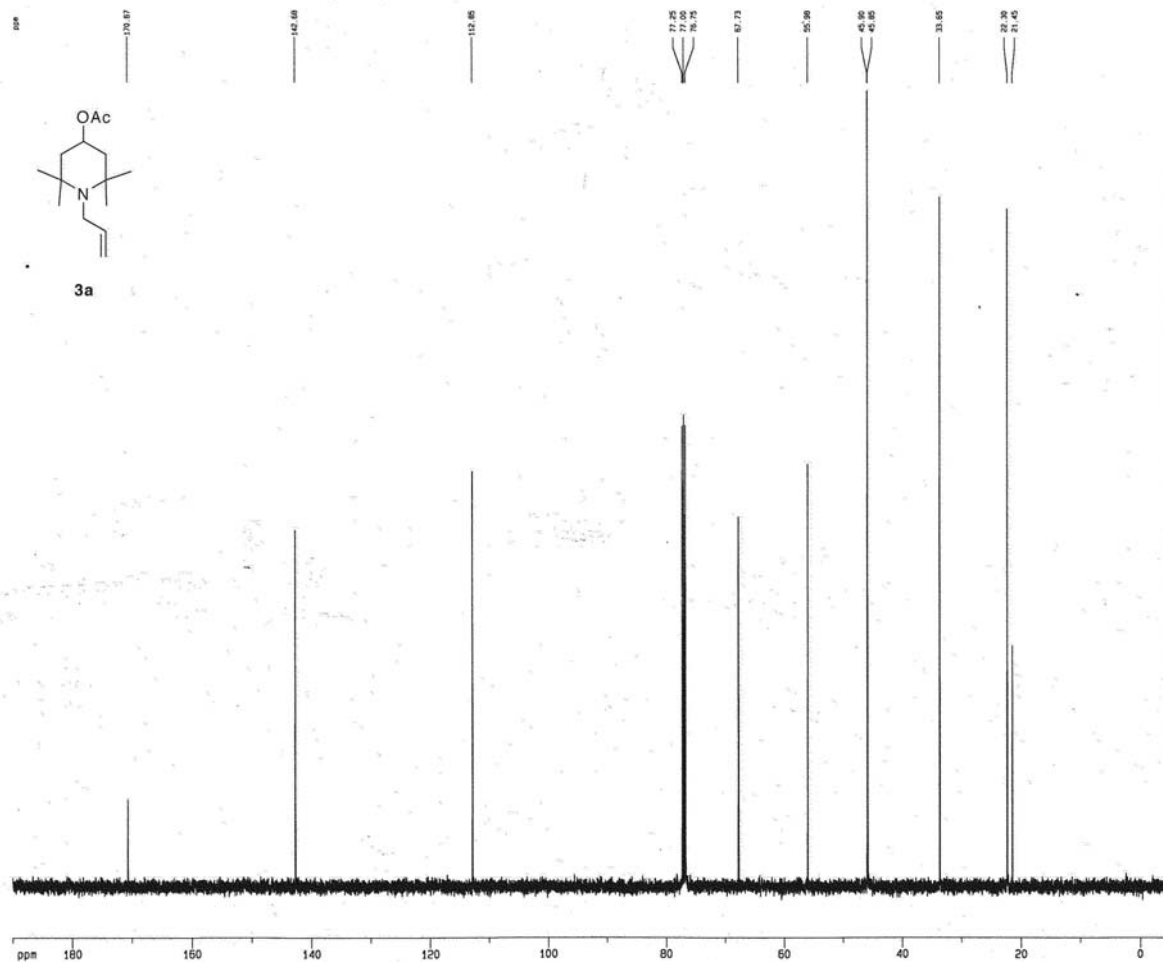

Current Data Parameters  
USER anders  
NAME cdev001  
EXPNO 2  
PROCNO 1

F2 - Acquisition Parameters  
Date\_ 20050302  
Time 15.12  
INSTRUM swep500  
PROBHD 5 mm broadband  
PULPROG zgpg30  
TD 85536  
SOLVENT CDCl3  
NS 271  
DS 4  
SWH 36303.031 Hz  
FIDRES 0.462388 Hz  
AQ 1.0812945 sec  
RG 2560.3  
DM 15.500 usec  
DE 4.50 usec  
TE 300.0 K  
D1 0.25000000 sec  
D11 0.03000000 sec

===== CHANNEL f1 =====  
NUC1 <sup>13</sup>C  
P1 22.50 usec  
PL1 -6.00 dB  
RF01 125.764246 MHz

===== CHANNEL f2 =====  
CPDPRG2 waltz16  
NUC2 <sup>1</sup>H  
PCPD2 88.00 usec  
PL2 -1.00 dB  
PL12 14.40 dB  
RF02 500.1326011 MHz

F2 - Processing parameters  
SI 65536  
SF 125.7654270 MHz  
WDW EM  
SSB 0  
LB 1.00 Hz  
GB 0  
PC 2.00

10 MHz plot parameters  
CX 22.80 cm  
F1P 190.000 ppm  
F1 23956.28 Hz  
F2P -5.000 ppm  
F2 -626.30 Hz  
FREQH 8.552633 ppm/cm  
NUC1 1015.75366 Hz/cm

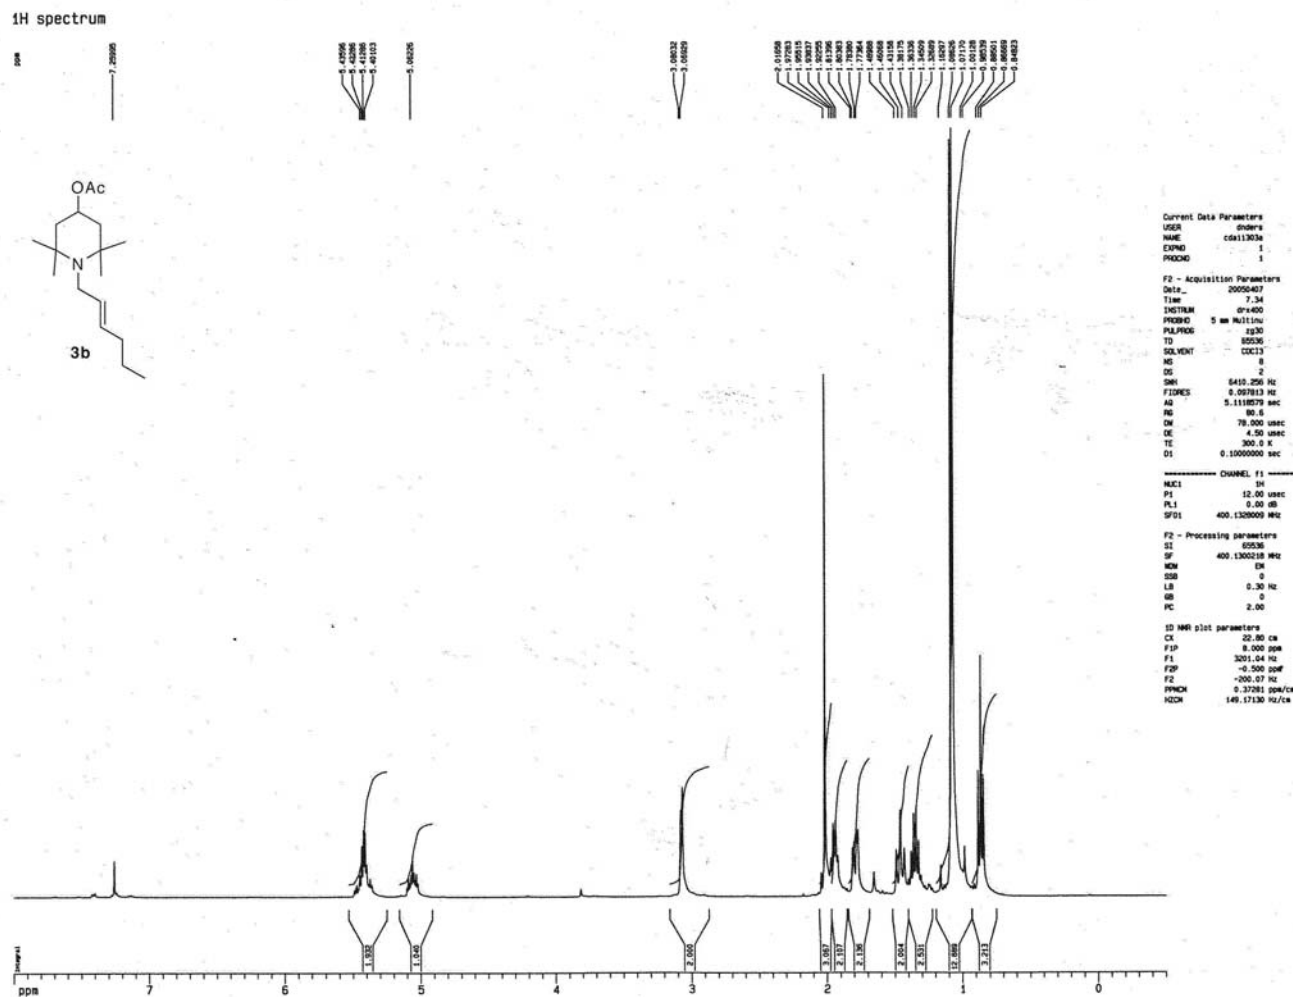

13C spectrum with 1H decoupling

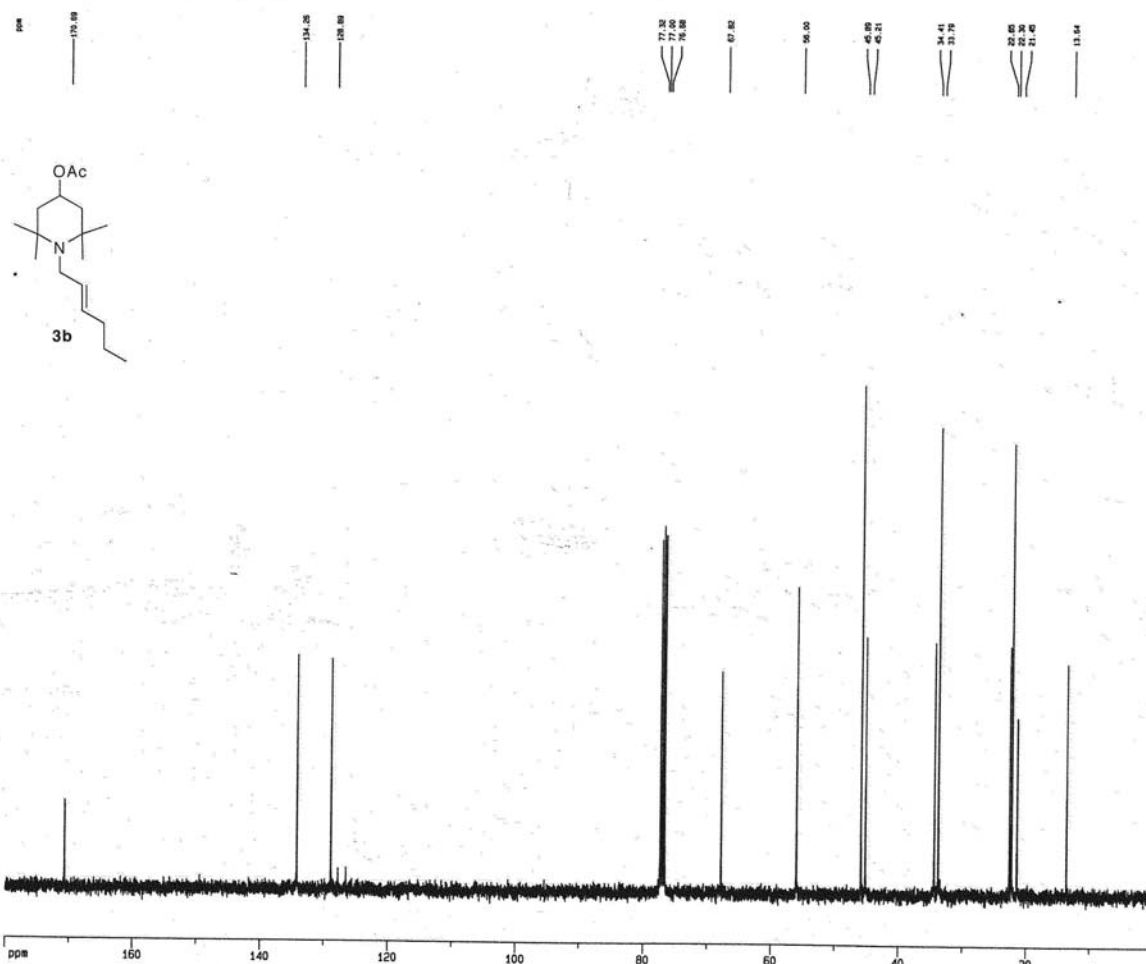

Current Data Parameters  
USER anders  
NAME cell1303a  
EXPNO 2  
PROCNO 1

F2 - Acquisition Parameters  
Date\_ 20090407  
Time 7.30  
INSTRUM drv400  
PROBHD 5 mm HLL111m  
PULPROG zgpg30  
TD 65536  
SOLVENT CDCl3  
NS 480  
DS 4  
SWH 24154.590 Hz  
FIDRES 0.368570 Hz  
AQ 1.396462 sec  
RG 4097.5  
OW 25.700 usec  
DE 4.50 usec  
TE 300.2 K  
D1 0.10000000 sec  
D11 0.03000000 sec

===== CHANNEL f1 =====  
NUC1 13C  
P1 8.00 usec  
PL1 -3.00 dB  
SFO1 100.6237864 MHz

===== CHANNEL f2 =====  
CPDPRG2 waltz16  
NUC2 1H  
PCPD2 96.00 usec  
PL2 0.00 dB  
PL12 17.00 dB  
SFO2 400.1320007 MHz

F2 - Processing parameters  
SI 32768  
SF 100.6127741 MHz  
WDW EM  
SSB 0  
LB 1.00 Hz  
GB 0  
PC 1.00

1D NMR plot parameters  
CX 20.80 cm  
FIP 180.000 ppm  
F1 18119.30 Hz  
F2 0.000 ppm  
F3 0.00 Hz  
WPROB 7.85674 usec/cm  
H2OM 754.31140 Hz/cm

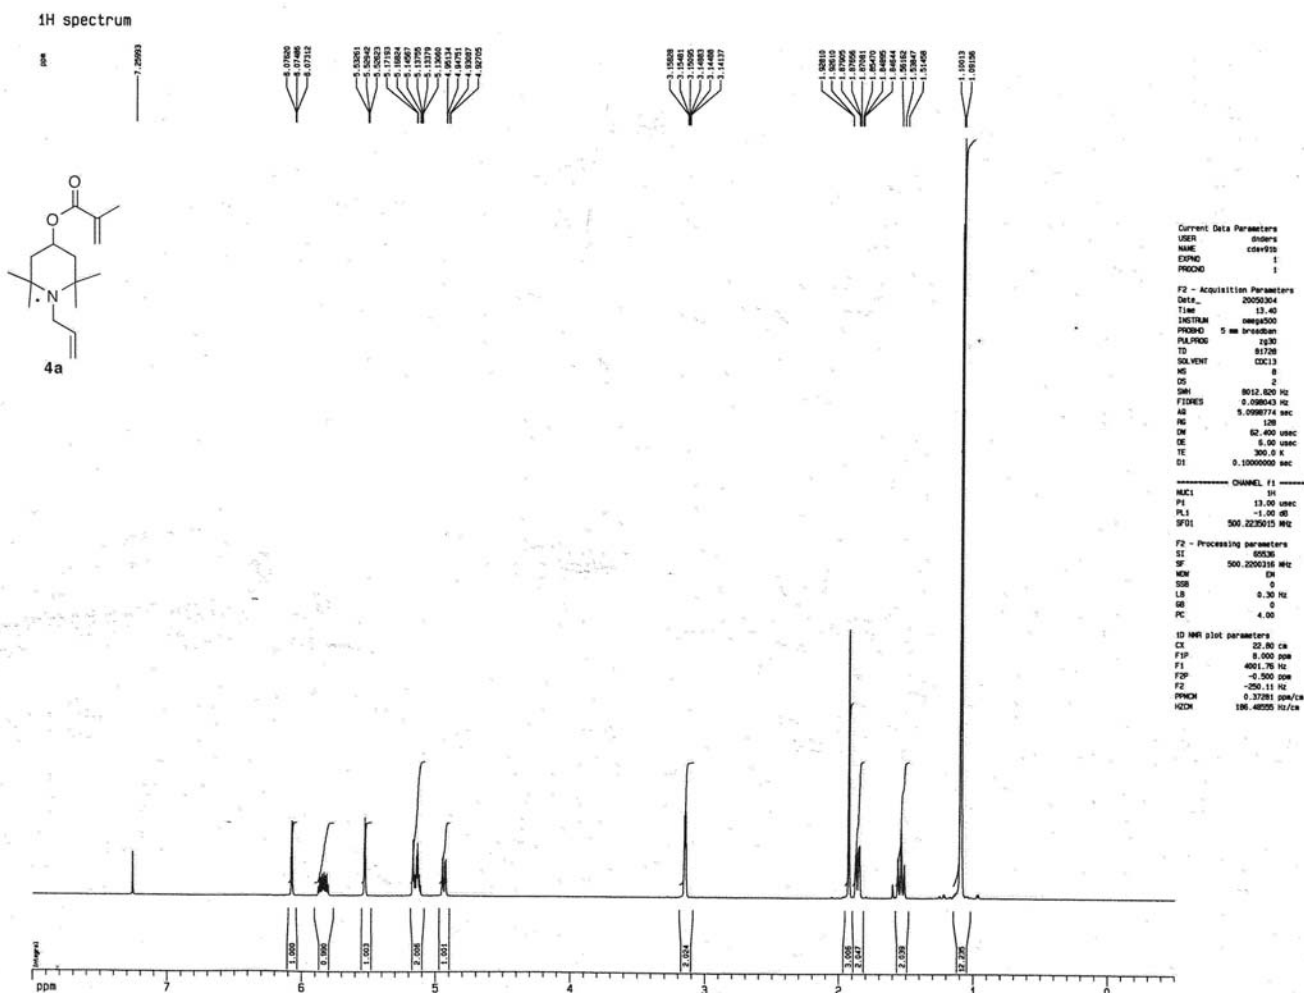

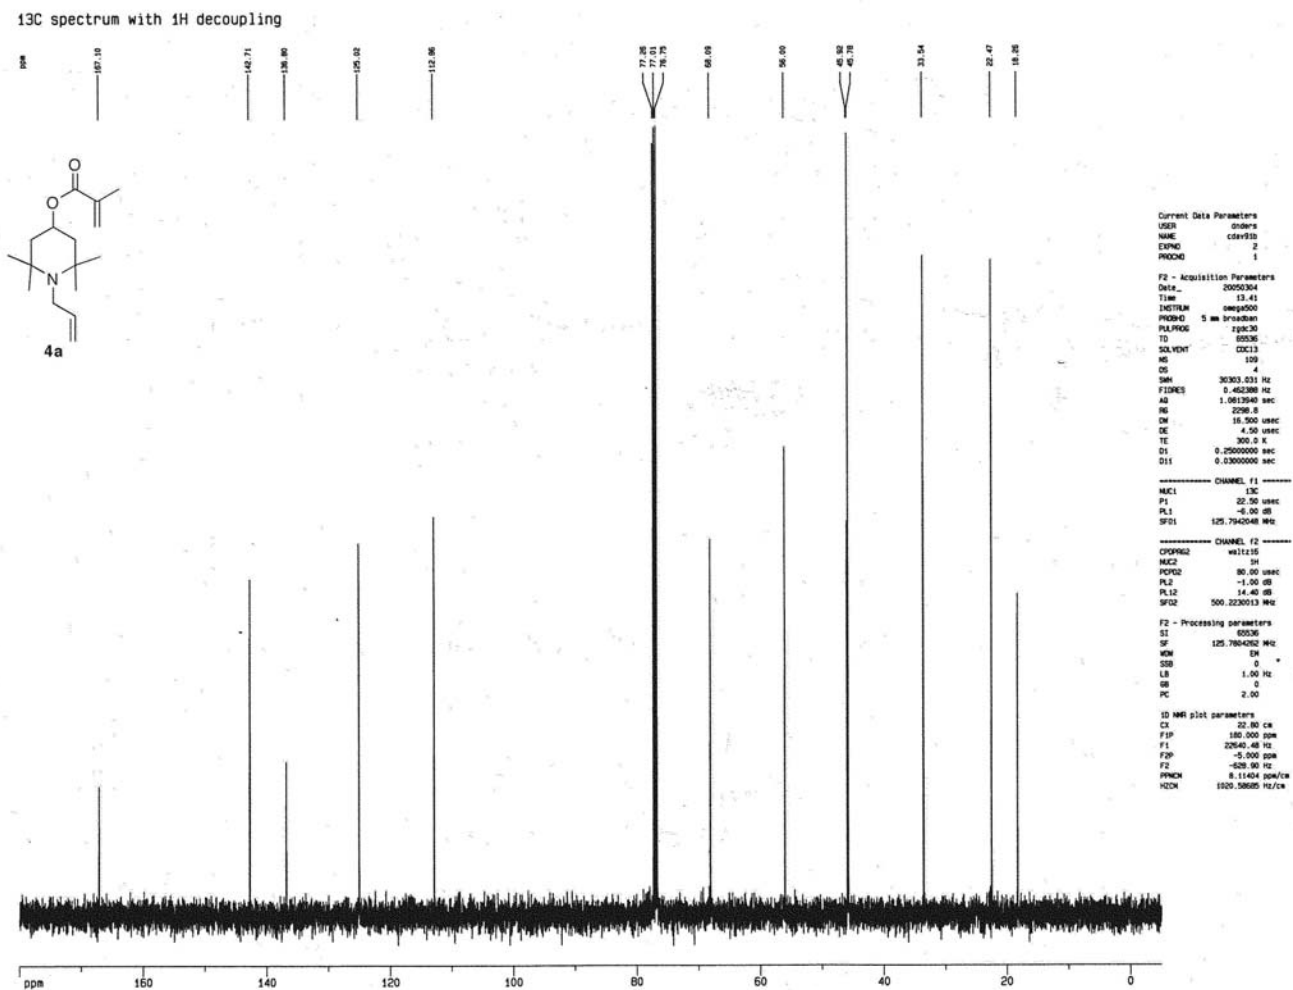

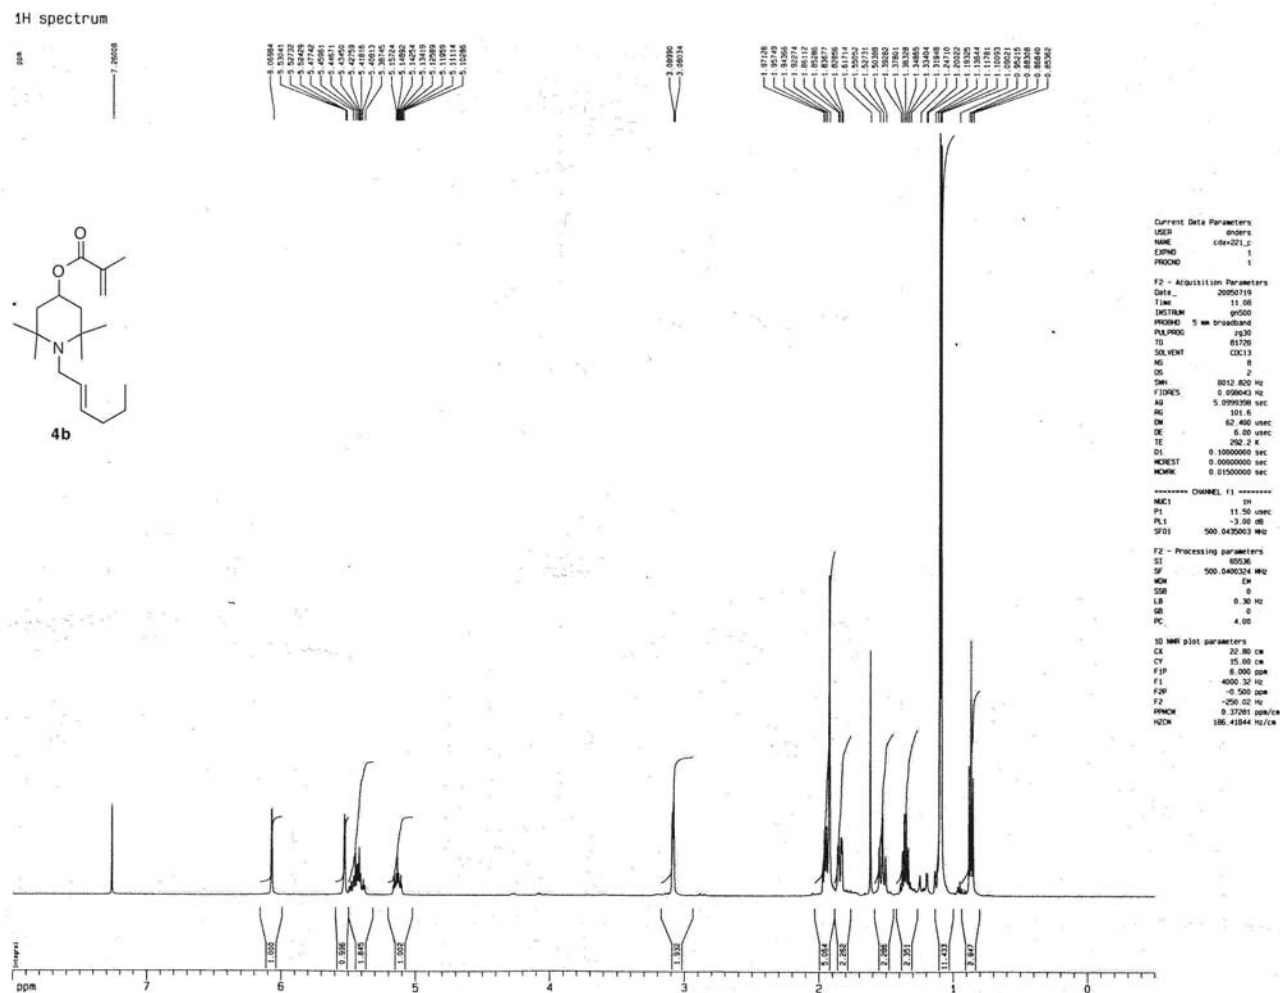

<sup>13</sup>C spectrum with <sup>1</sup>H decoupling

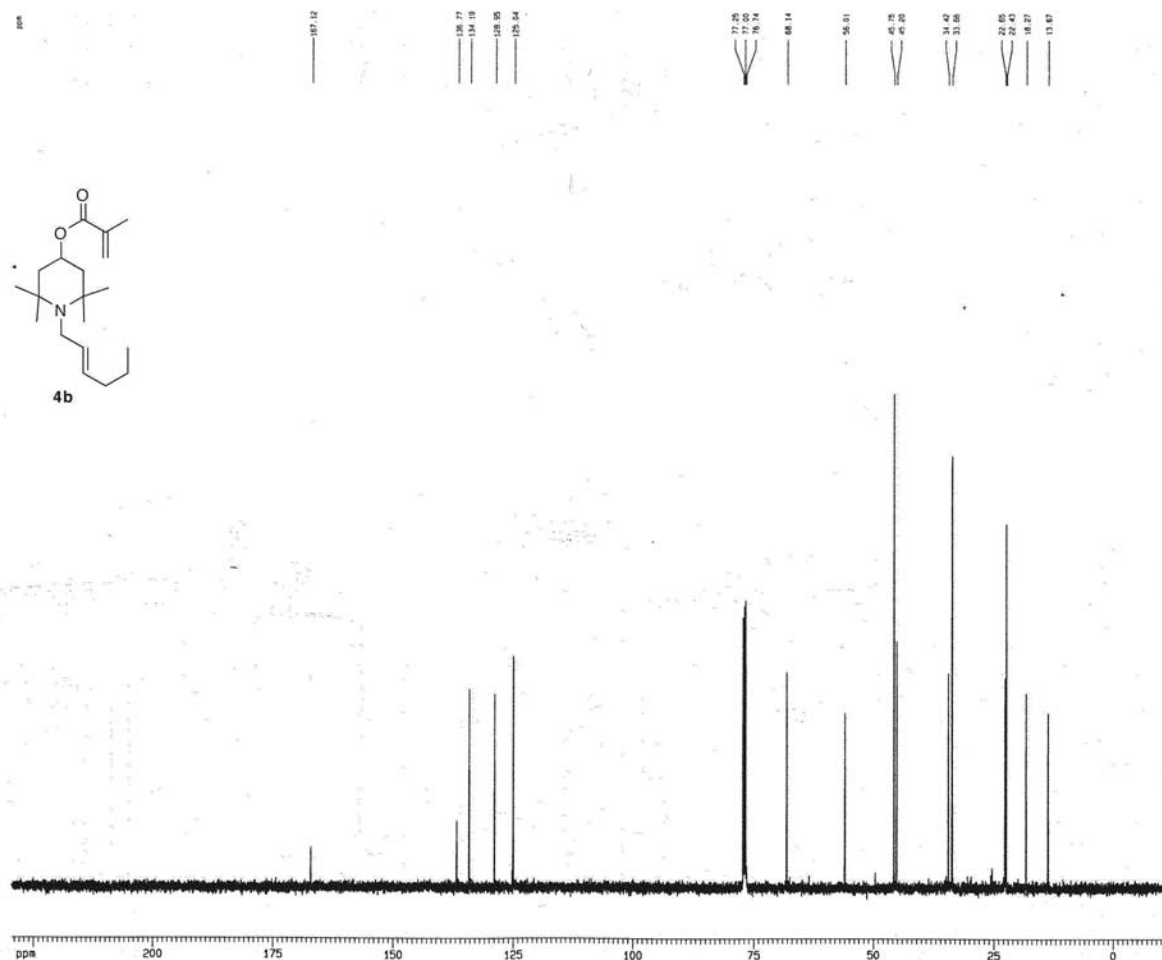

Current Data Parameters  
USER: dmars  
NAME: c6a221\_s  
EXPNO: 2  
PROCNO: 1

F2 - Acquisition Parameters  
Date\_: 20050719  
Time: 11:10  
INSTRUM: gpc500  
PROBHD: 5 mm broadband  
PULPROG: zgpg30  
TD: 65536  
SOLVENT: CDCl3  
NS: 524  
DS: 4  
SWH: 30303.531 Hz  
FIDRES: 0.452768 Hz  
AQ: 1.881435 sec  
RG: 3649.1  
OR: 18.500 umsc  
DE: 4.50 umsc  
TE: 292.4 K  
D1: 0.2000000 sec  
d11: 0.0300000 sec  
MORST: 0.0000000 sec  
MORV: 0.0100000 sec

===== CHANNEL f1 =====  
NUC1: <sup>13</sup>C  
P1: 13.00 umsc  
PL1: 0.00 dB  
SFO1: 125.7603500 MHz

===== CHANNEL f2 =====  
CPROG2: zgpg30  
NUC2: <sup>1</sup>H  
P2: 86.00 umsc  
PL2: -3.00 dB  
PL12: 15.40 dB  
SFO2: 500.6420000 MHz

F2 - Processing parameters  
SI: 65536  
SF: 125.7351684 MHz  
WDW: EM  
SSB: 0  
LB: 1.00 Hz  
GB: 0  
PC: 2.00

1D NMR plot parameters  
CX: 20.80 cm  
CY: 10.00 cm  
FIR: 320.520 gsm  
F1: 28858.70 Hz  
F2P: -10.567 gsm  
F2: -1321.05 Hz  
PNUC: 10.52747 gsm/cm  
HNC: 1323.87310 Hz/cm

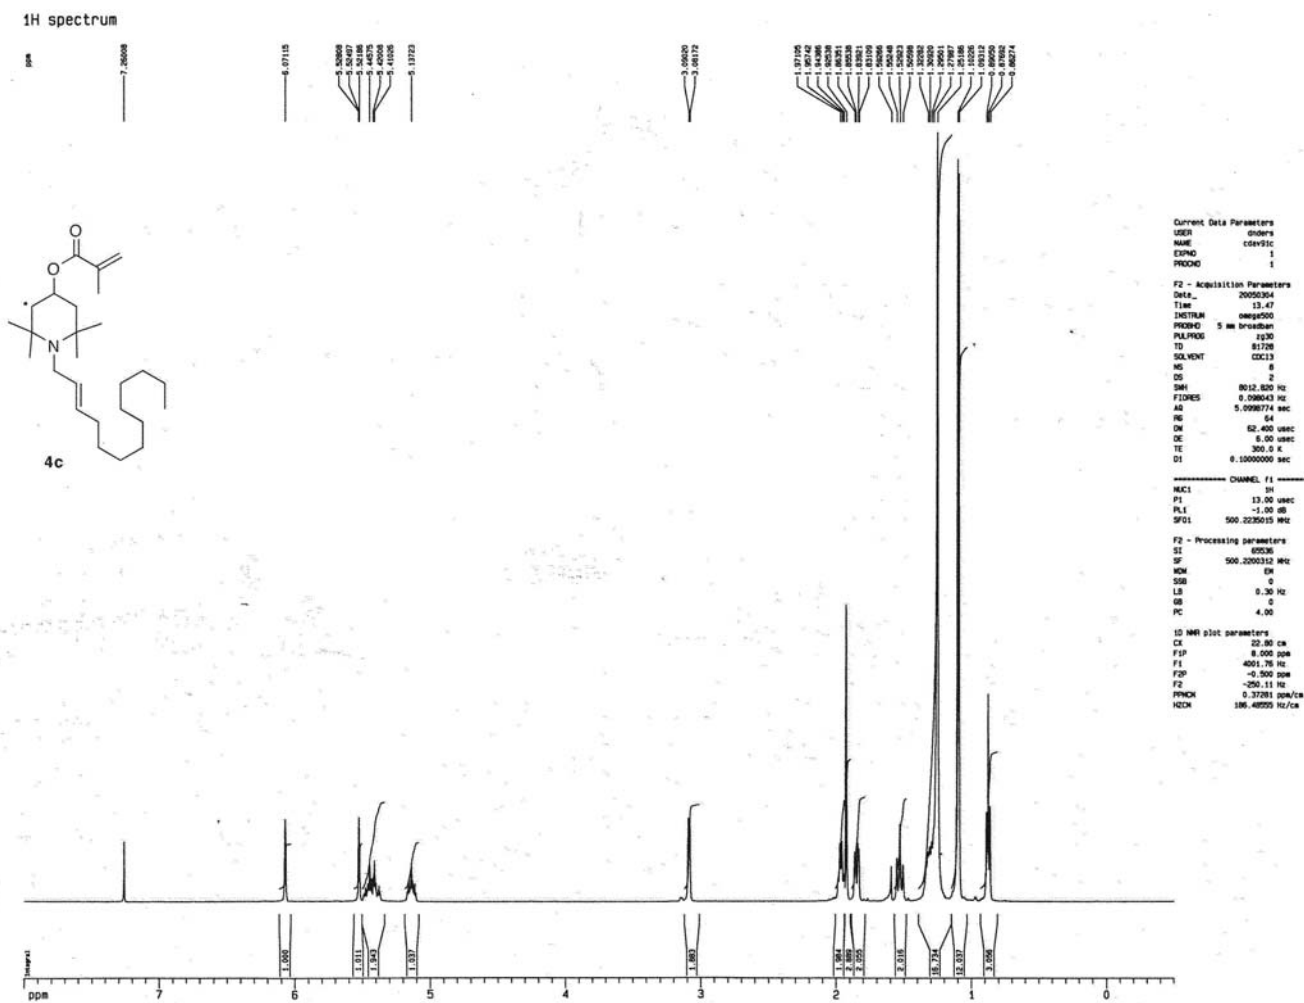



13C spectrum with 1H decoupling

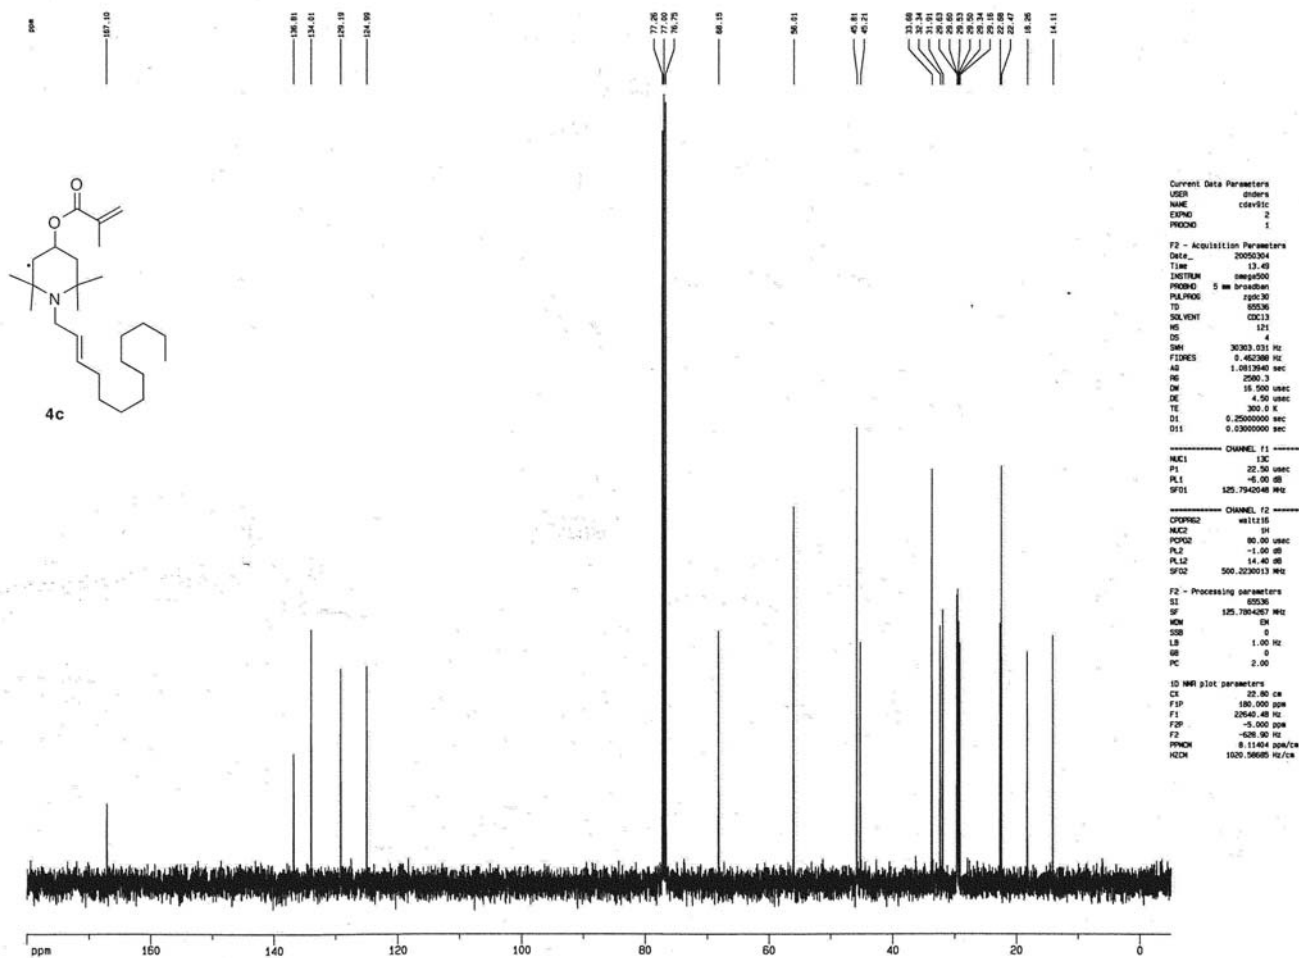

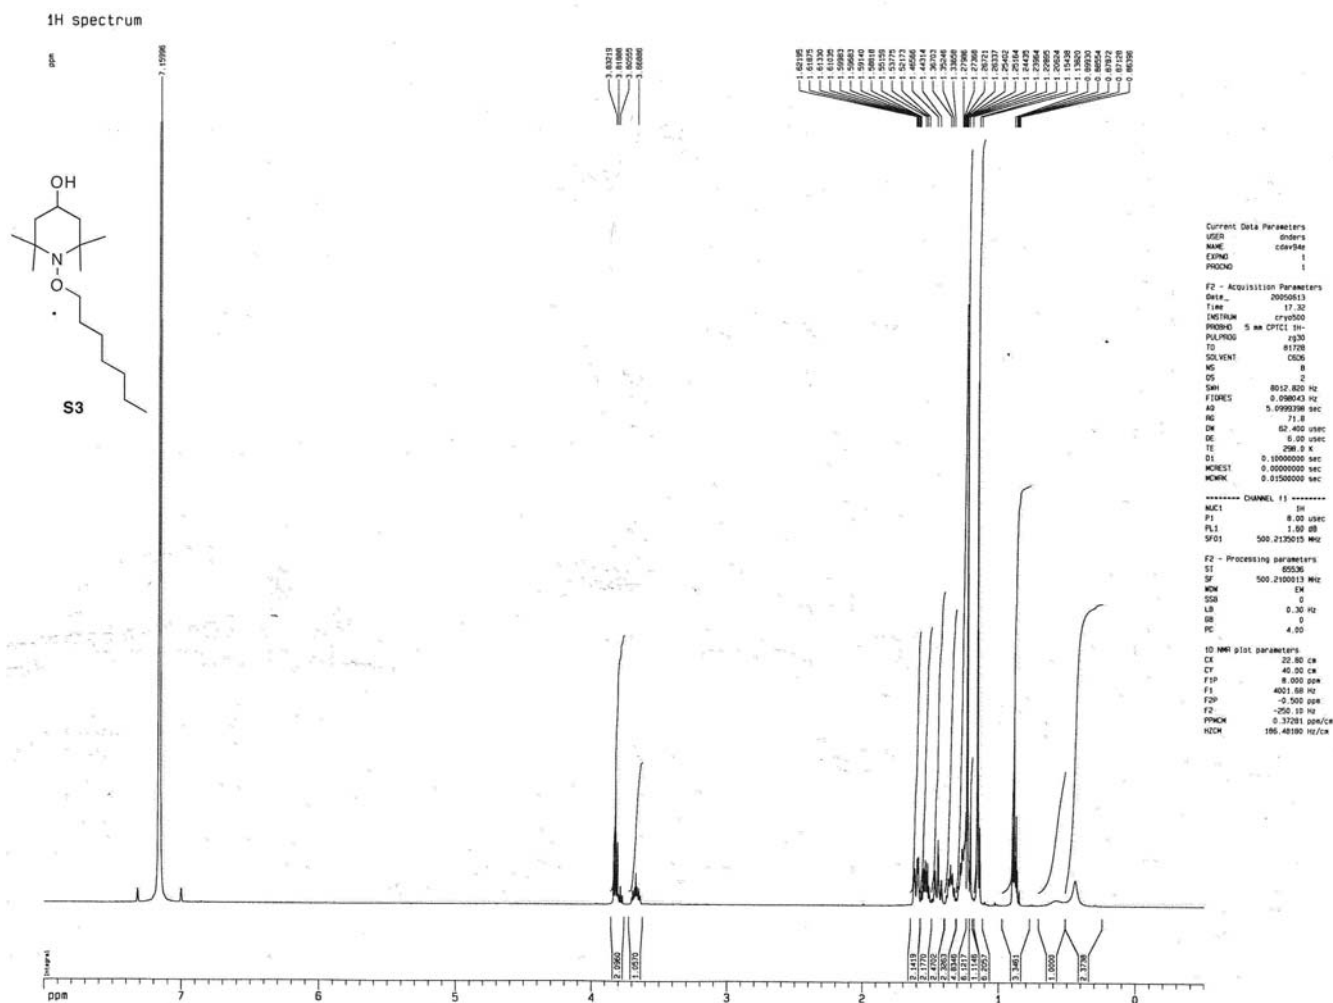

13C spectrum with 1H decoupling

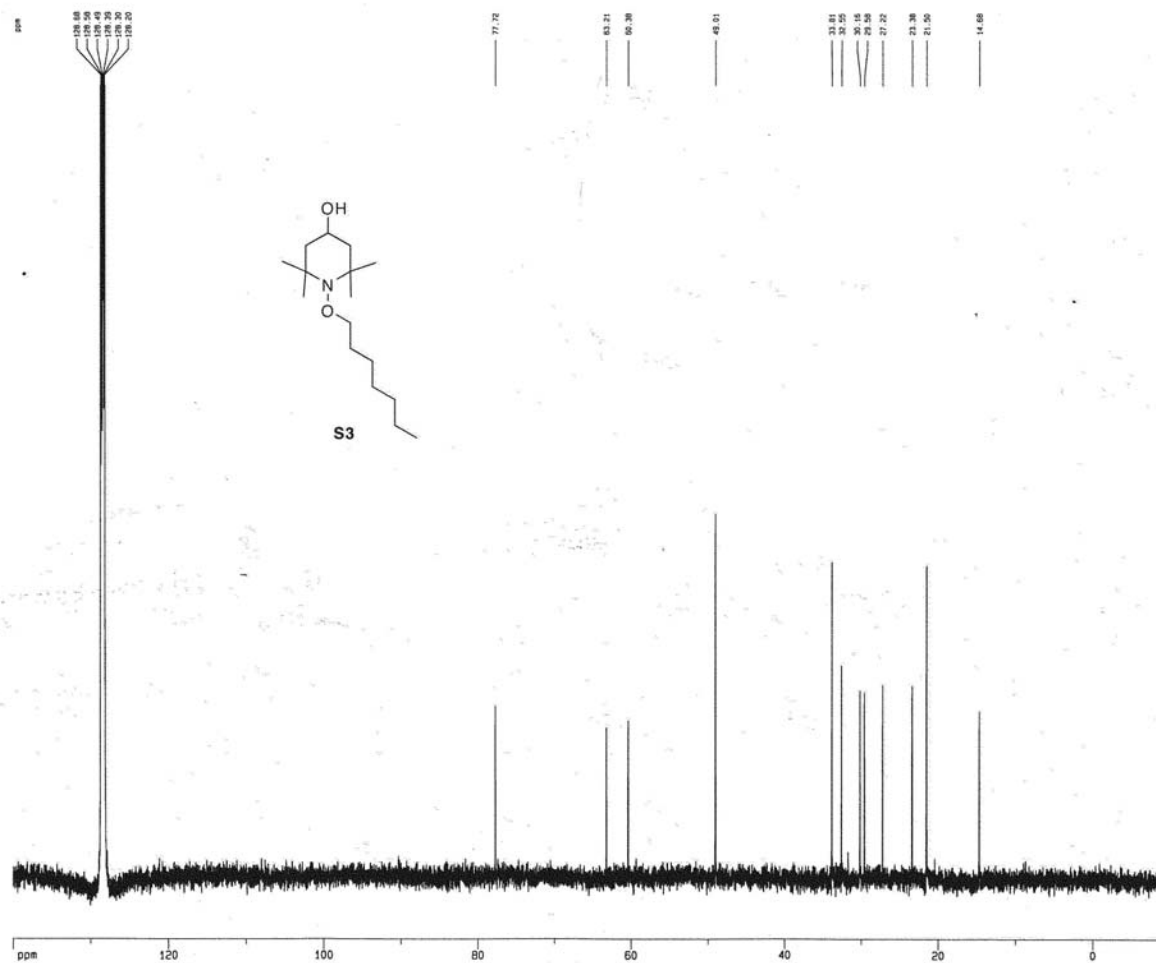

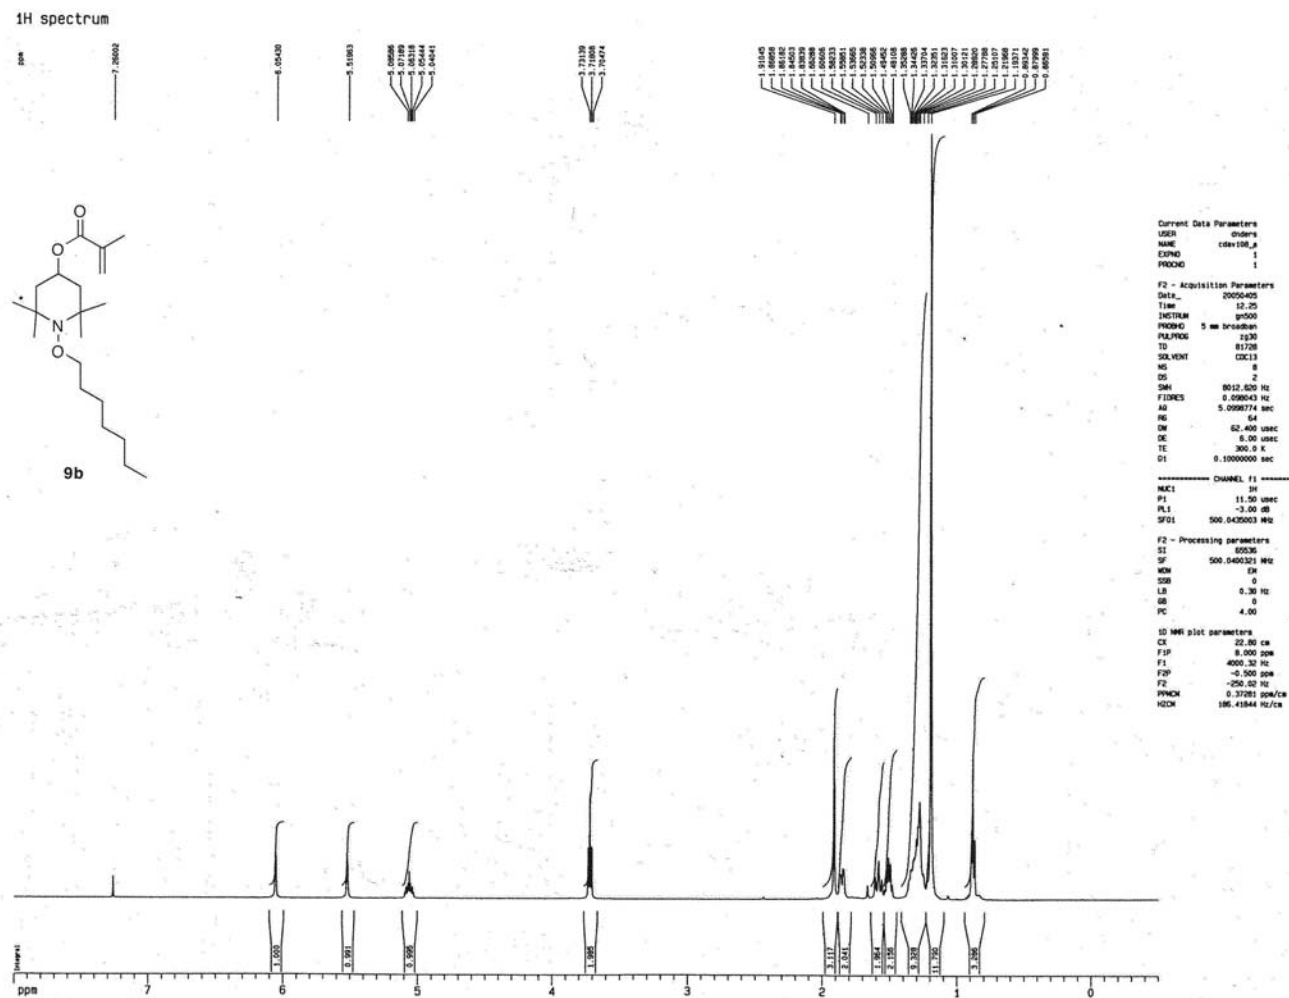

<sup>13</sup>C spectrum with <sup>1</sup>H decoupling

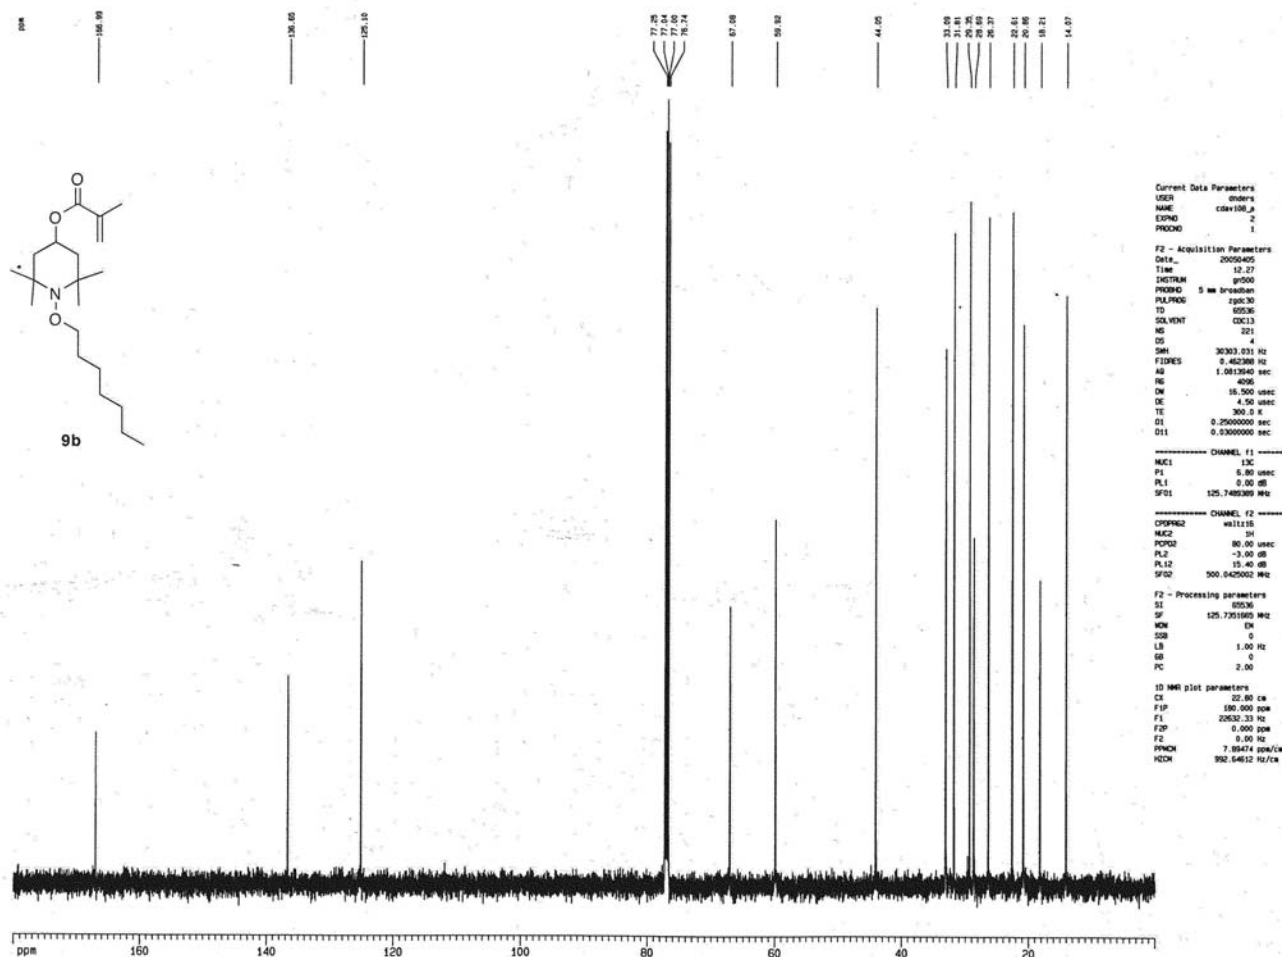

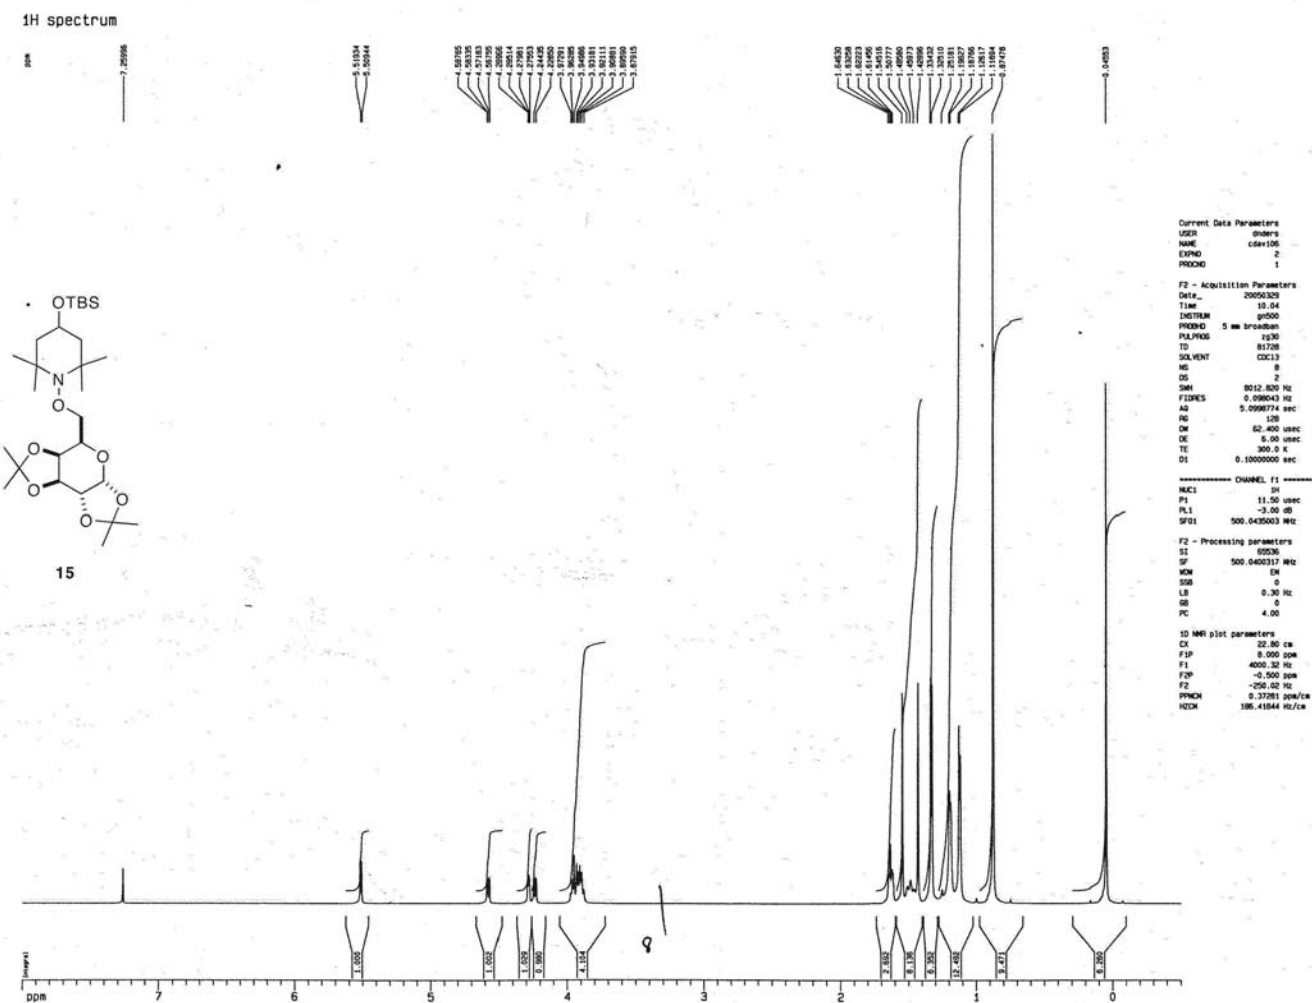

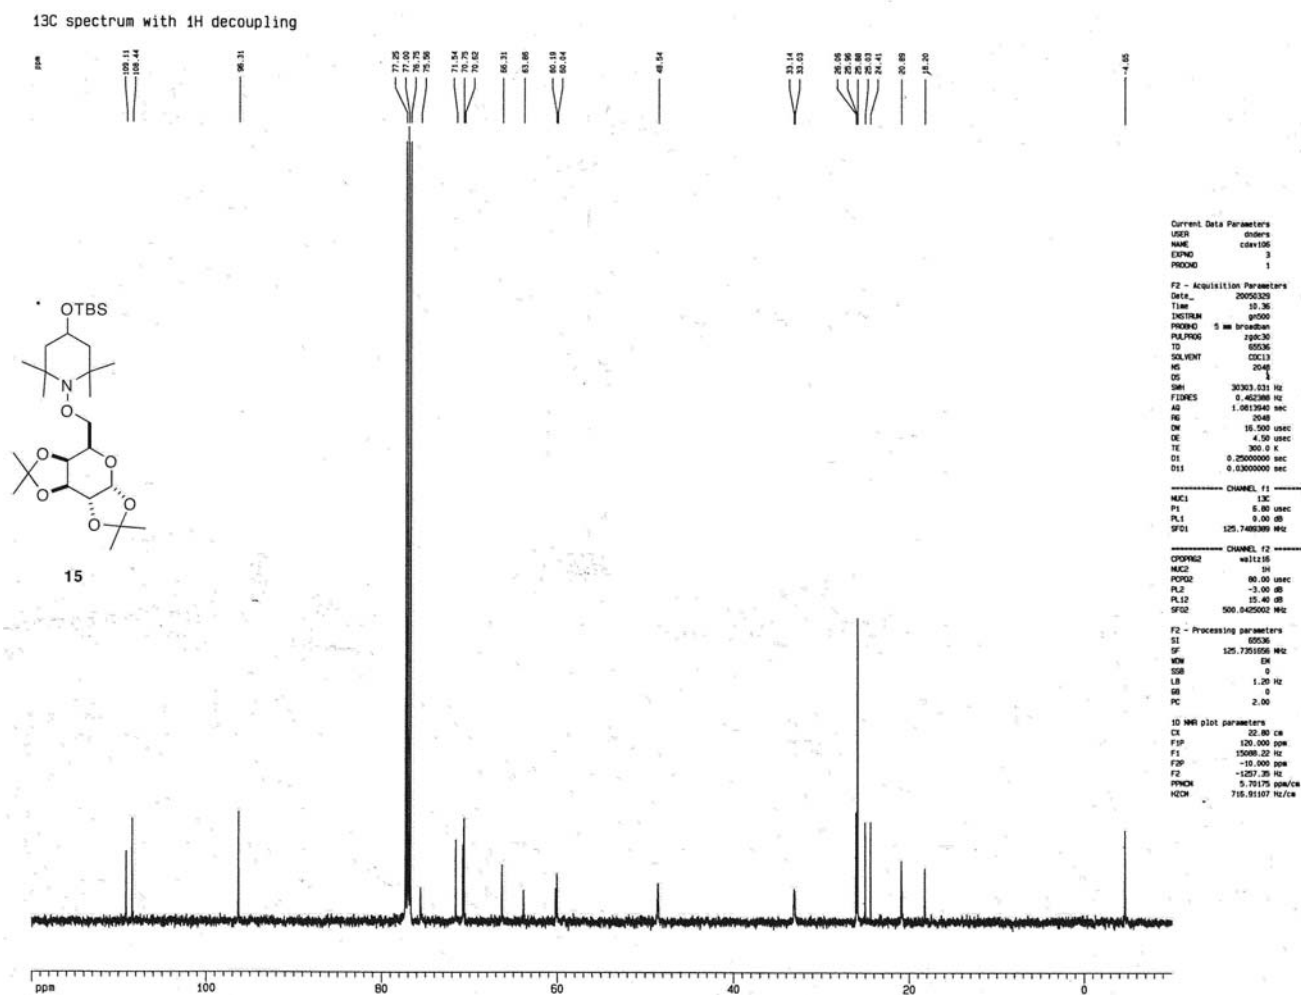

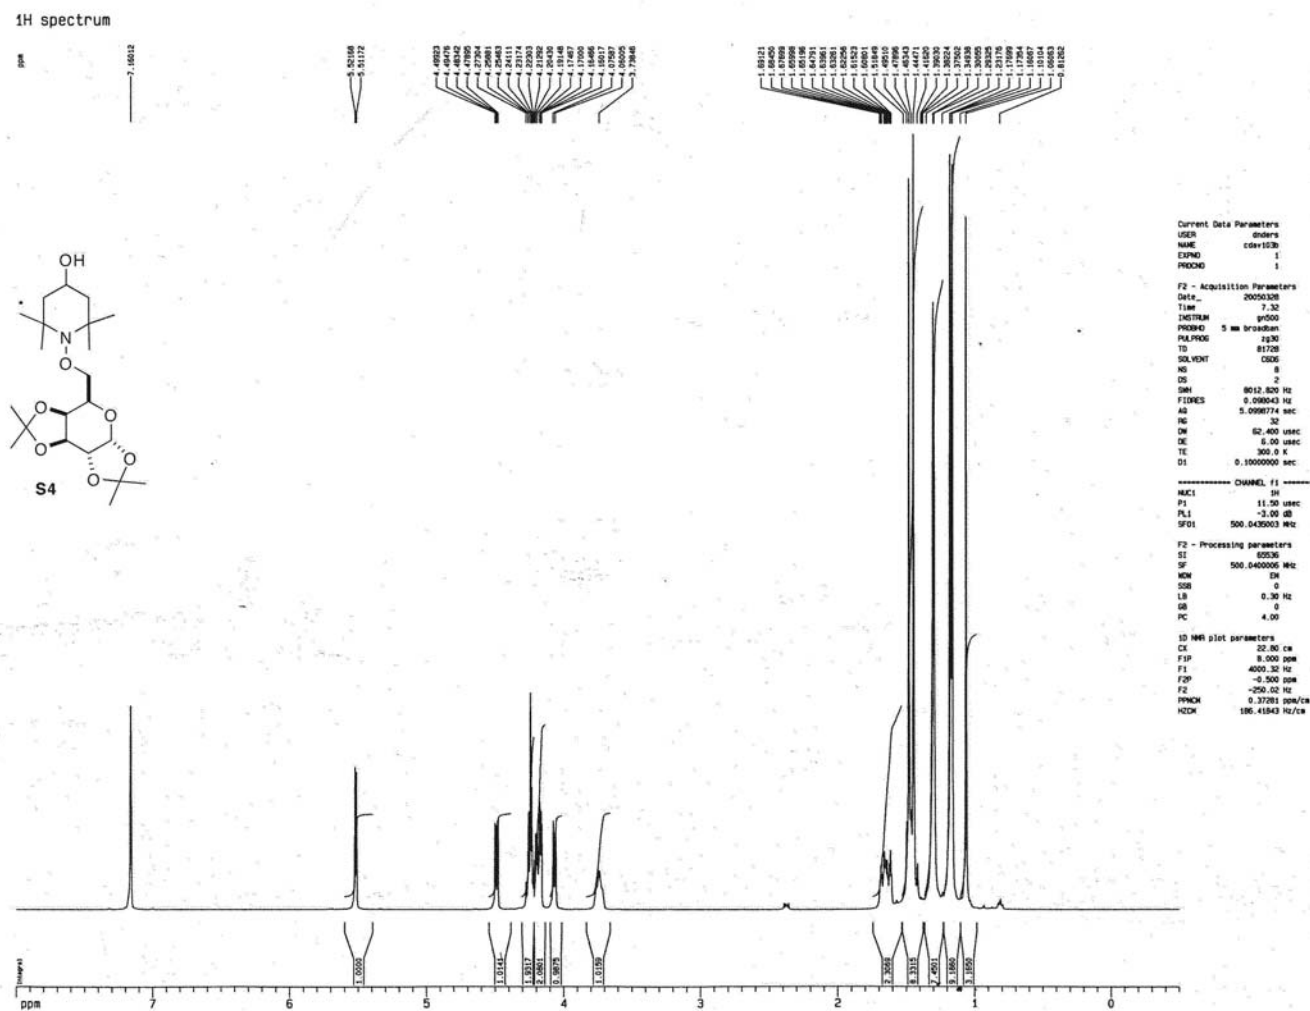



13C spectrum with 1H decoupling

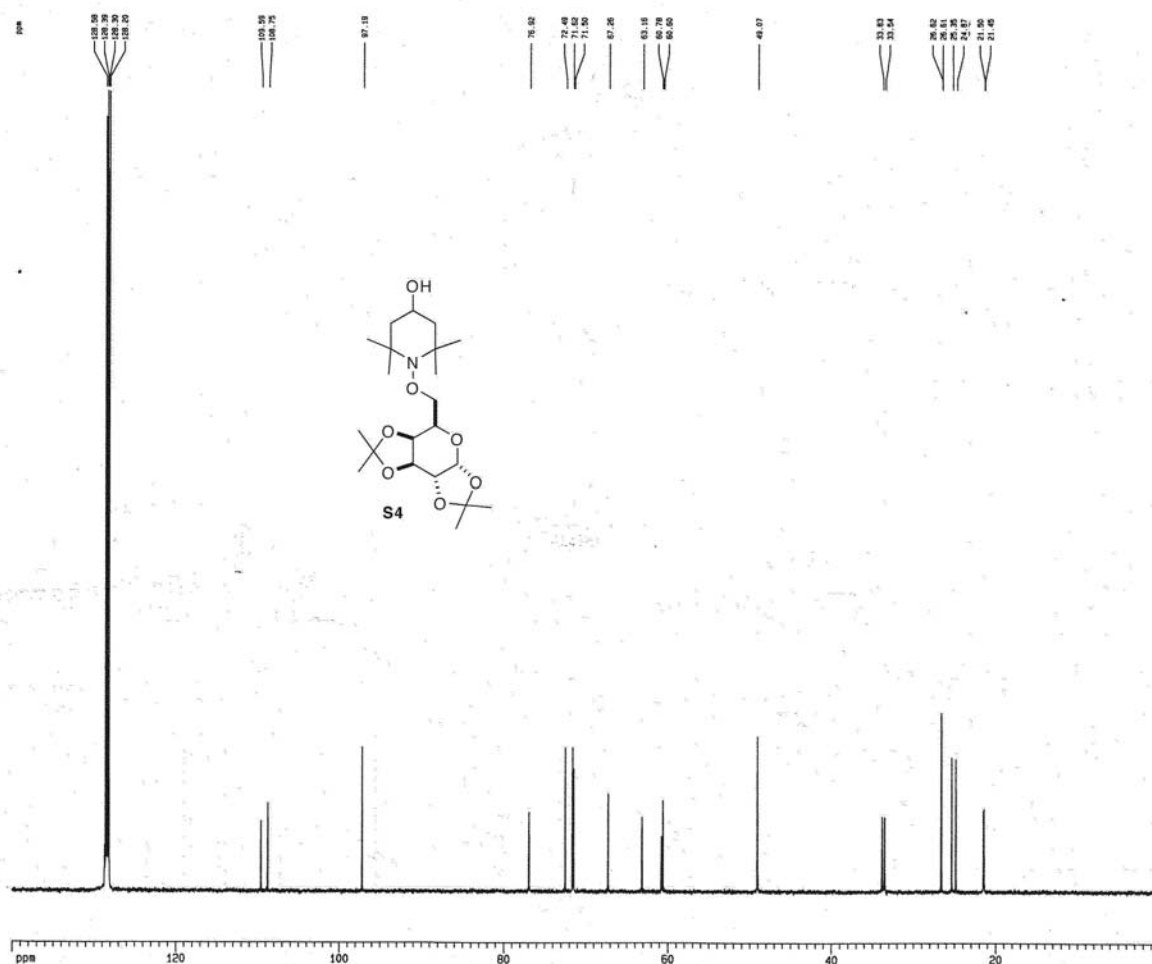

Current Data Parameters  
USER: anders  
NAME: cdev103b  
EXPNO: 2  
PROCNO: 1

F2 - Acquisition Parameters  
Date\_: 20050328  
Time: 7.33  
INSTRUM: gnuco  
PROBHD: 5 mm broadband  
PULPROG: zgpg30  
TD: 65536  
SOLVENT: CDCl3  
NS: 256  
DS: 4  
SWH: 30303.631 Hz  
FIDRES: 0.462388 Hz  
AQ: 1.0815940 sec  
RG: 4096  
DM: 15.500 usec  
DE: 4.50 usec  
TE: 300.0 K  
D1: 0.25000000 sec  
D11: 0.03000000 sec

CHANNEL f1  
NUC1: 13C  
P1: 6.00 usec  
PL1: 0.00 dB  
SFO1: 125.7603389 MHz

CHANNEL f2  
CPDPRG2: waltz16  
NUC2: 1H  
PCPD2: 80.00 usec  
PL2: -3.00 dB  
PL12: 15.40 dB  
SFO2: 500.642002 MHz

F2 - Processing parameters  
SI: 65536  
SF: 125.759711 MHz  
WDM: EM  
SSB: 0  
LB: 1.00 Hz  
GB: 0  
PC: 2.00

1D NMR plot parameters  
CX: 22.80 cm  
F1P: 140.000 ppm  
F1: 17602.91 Hz  
F2P: 0.000 ppm  
F2: 0.00 Hz  
PPHCH: 6.14035 ppm/cx  
HCHH: 772.05759 Hz/cx

C6D6

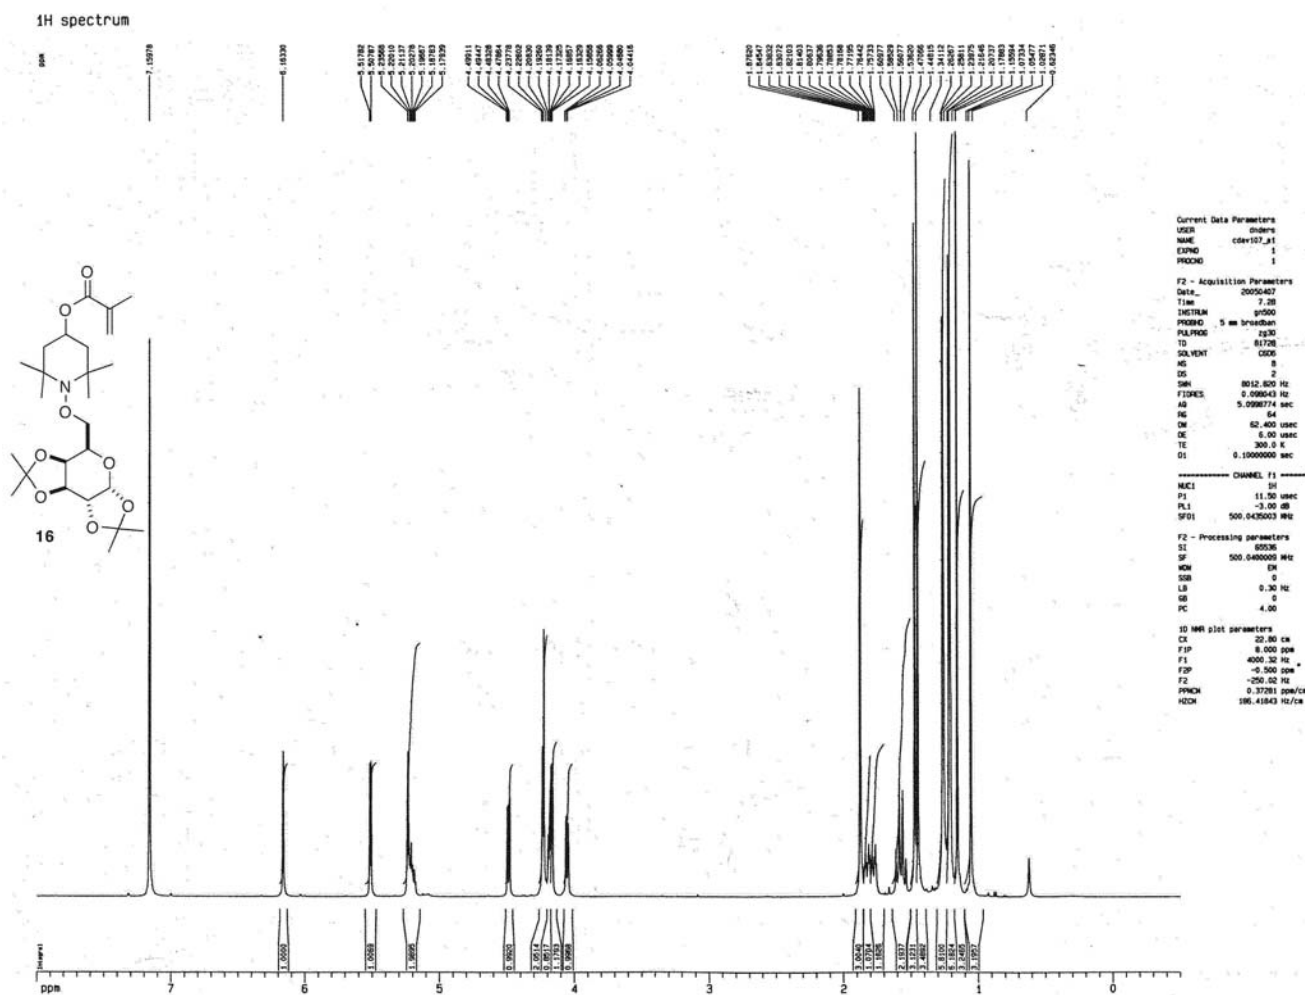

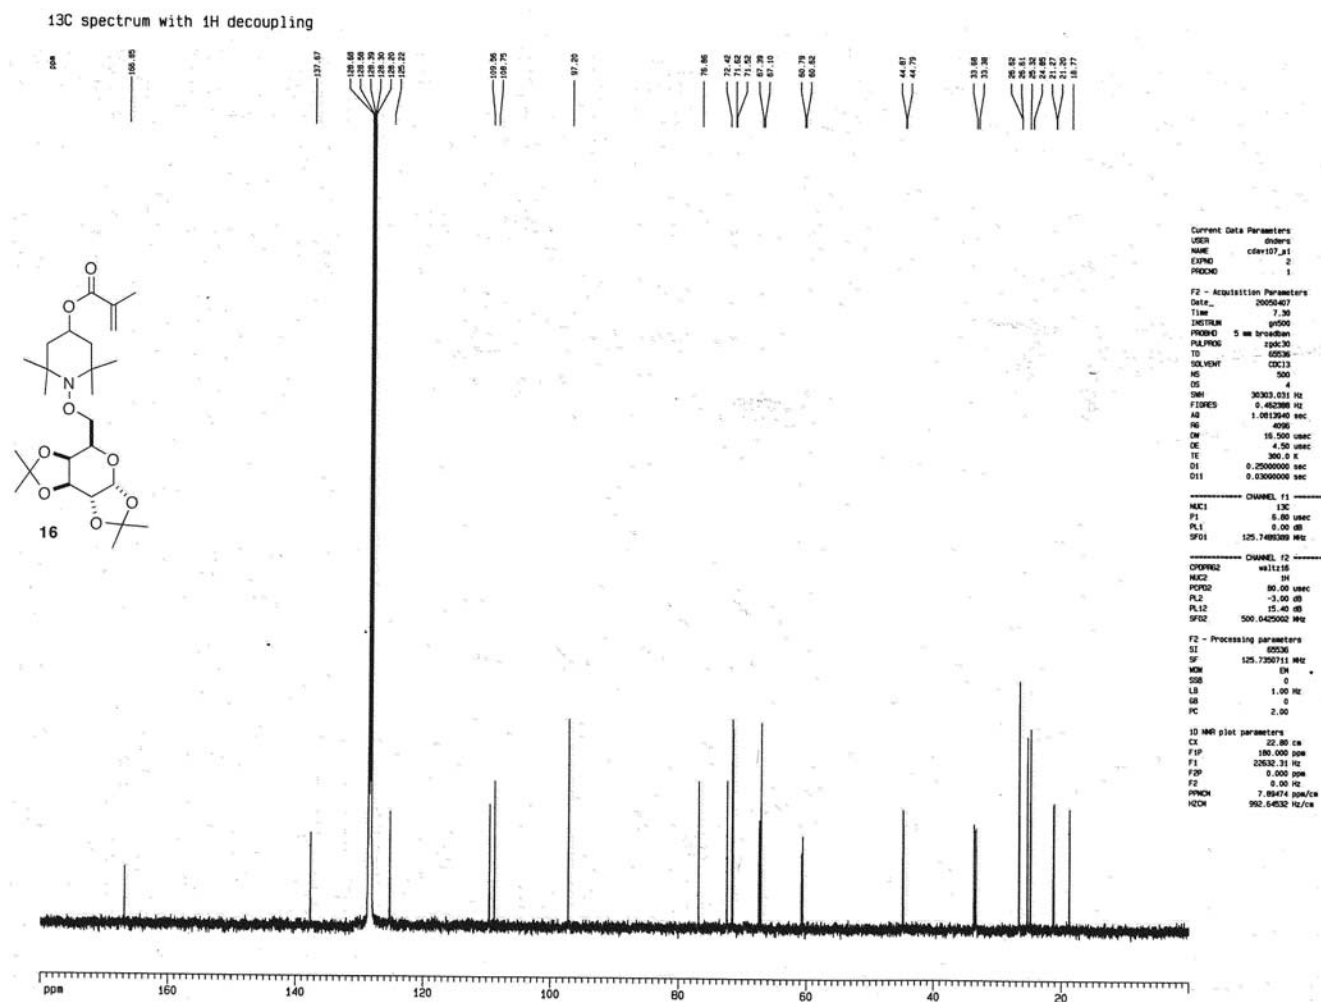

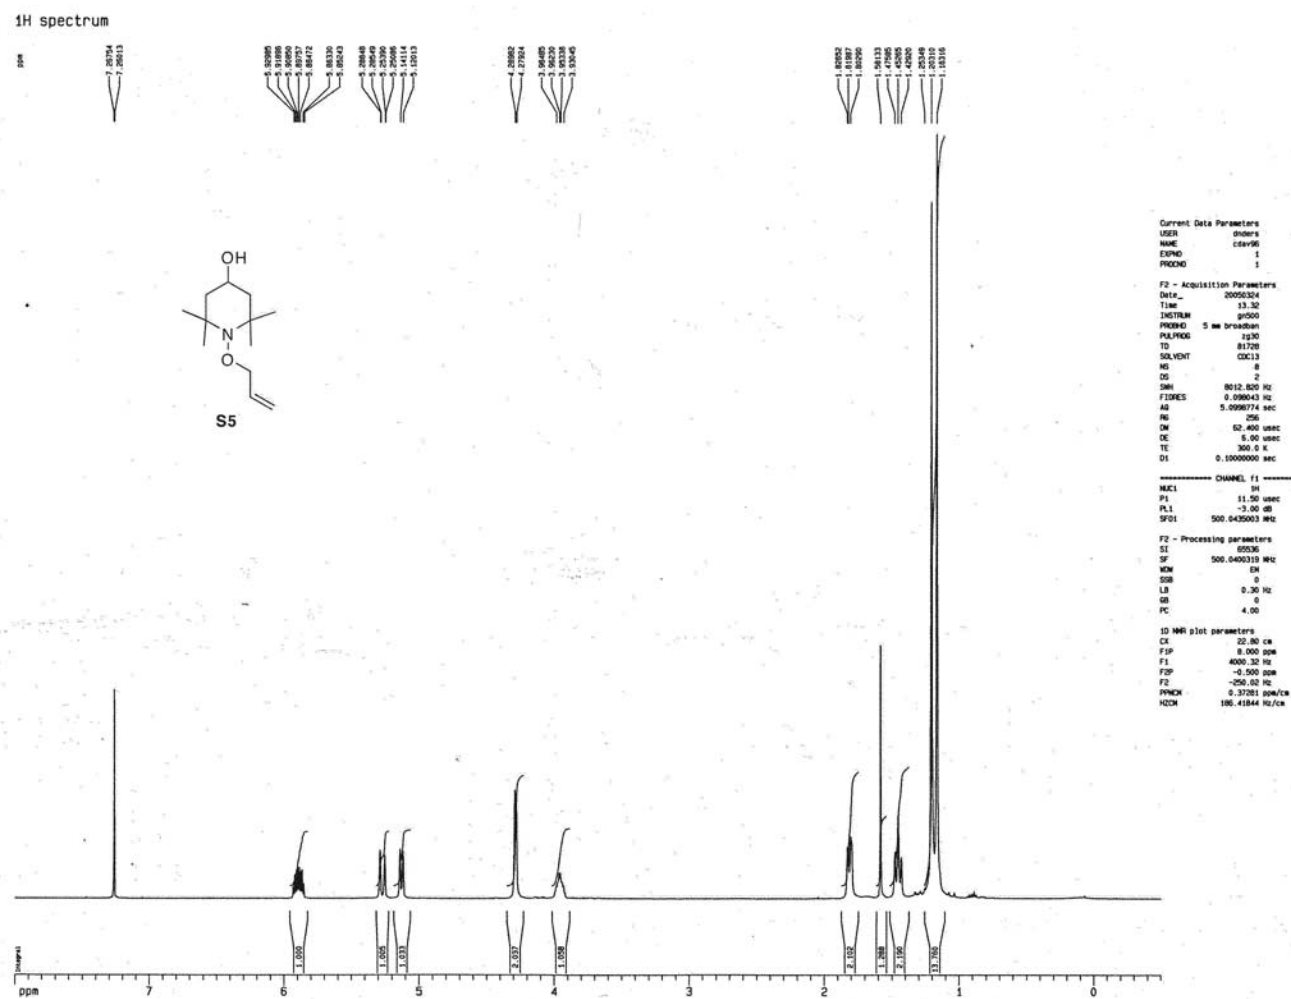

<sup>13</sup>C spectrum with <sup>1</sup>H decoupling

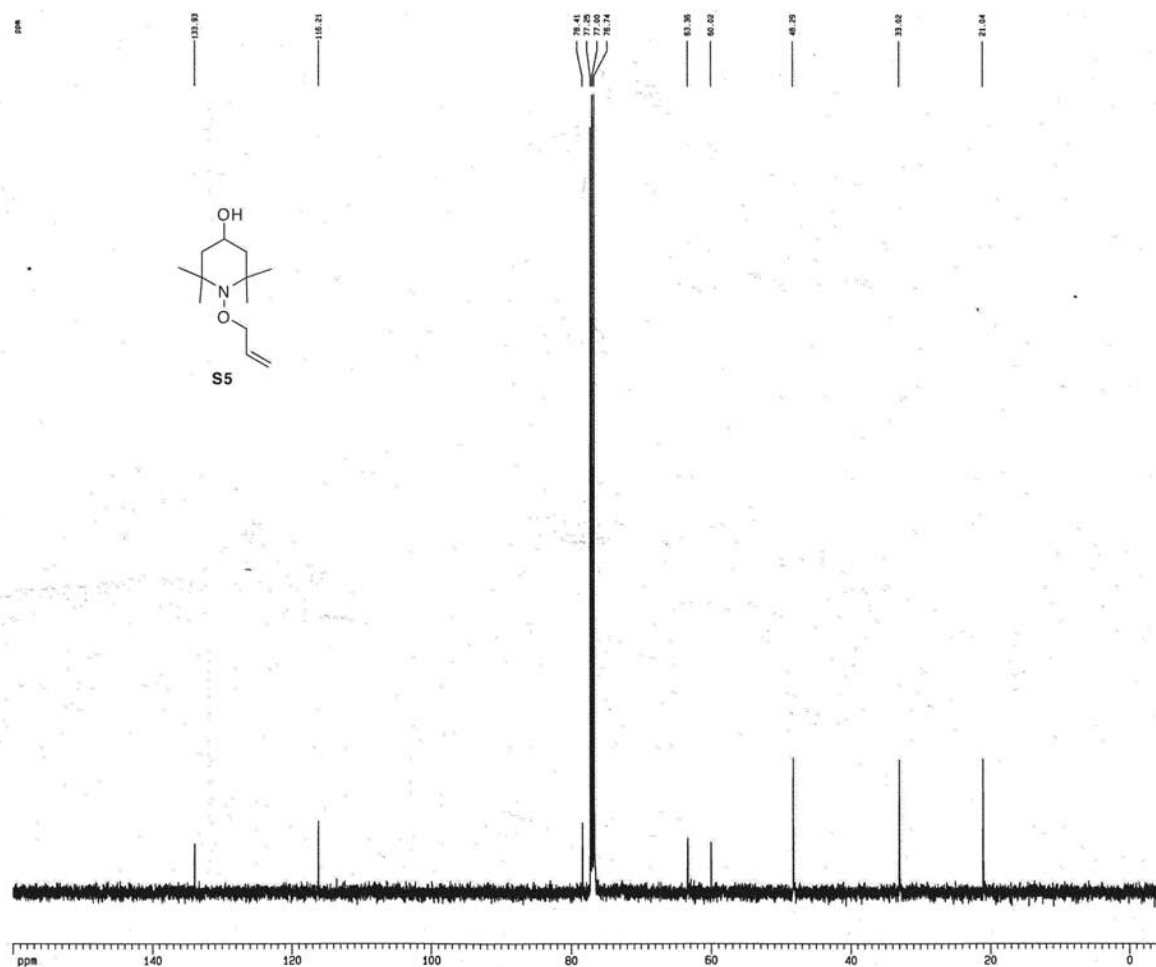

Current Data Parameters  
USER: dmars  
NAME: cov95  
EXPNO: 2  
PROCNO: 1

F2 - Acquisition Parameters  
Date\_: 20050324  
Time: 13.38  
INSTRUM: spect  
PROBHD: 5 mm broadband  
PULPROG: zgpg30  
TD: 65536  
SOLVENT: CDCl3  
NS: 632  
DS: 4  
SWH: 30303.031 Hz  
FIDRES: 0.462388 Hz  
AQ: 1.0813945 sec  
RG: 4096  
SM: 16.500 usec  
DE: 4.50 usec  
TE: 300.0 K  
D1: 0.25000000 sec  
D11: 0.03000000 sec

----- CHANNEL f1 -----  
NUC1: <sup>13</sup>C  
P1: 6.00 usec  
PL1: 0.00 dB  
SFO1: 125.740369 MHz

----- CHANNEL f2 -----  
CPDPRG2: waltz16  
NUC2: <sup>1</sup>H  
PCPD2: 86.00 usec  
PL2: -3.00 dB  
PL12: 15.40 dB  
SFO2: 500.0425002 MHz

F2 - Processing parameters  
SI: 65536  
SF: 125.7321050 MHz  
WDW: EM  
SSB: 0  
LB: 1.00 Hz  
GB: 0  
PC: 2.00

SD NMR plot parameters  
CX: 22.80 cm  
F1P: 500.000 ppm  
F1: 20117.63 Hz  
F2P: -5.000 ppm  
F2: -628.87 Hz  
FREQH: 7.23644 ppm/cm  
HSCN: 999.92554 Hz/cm

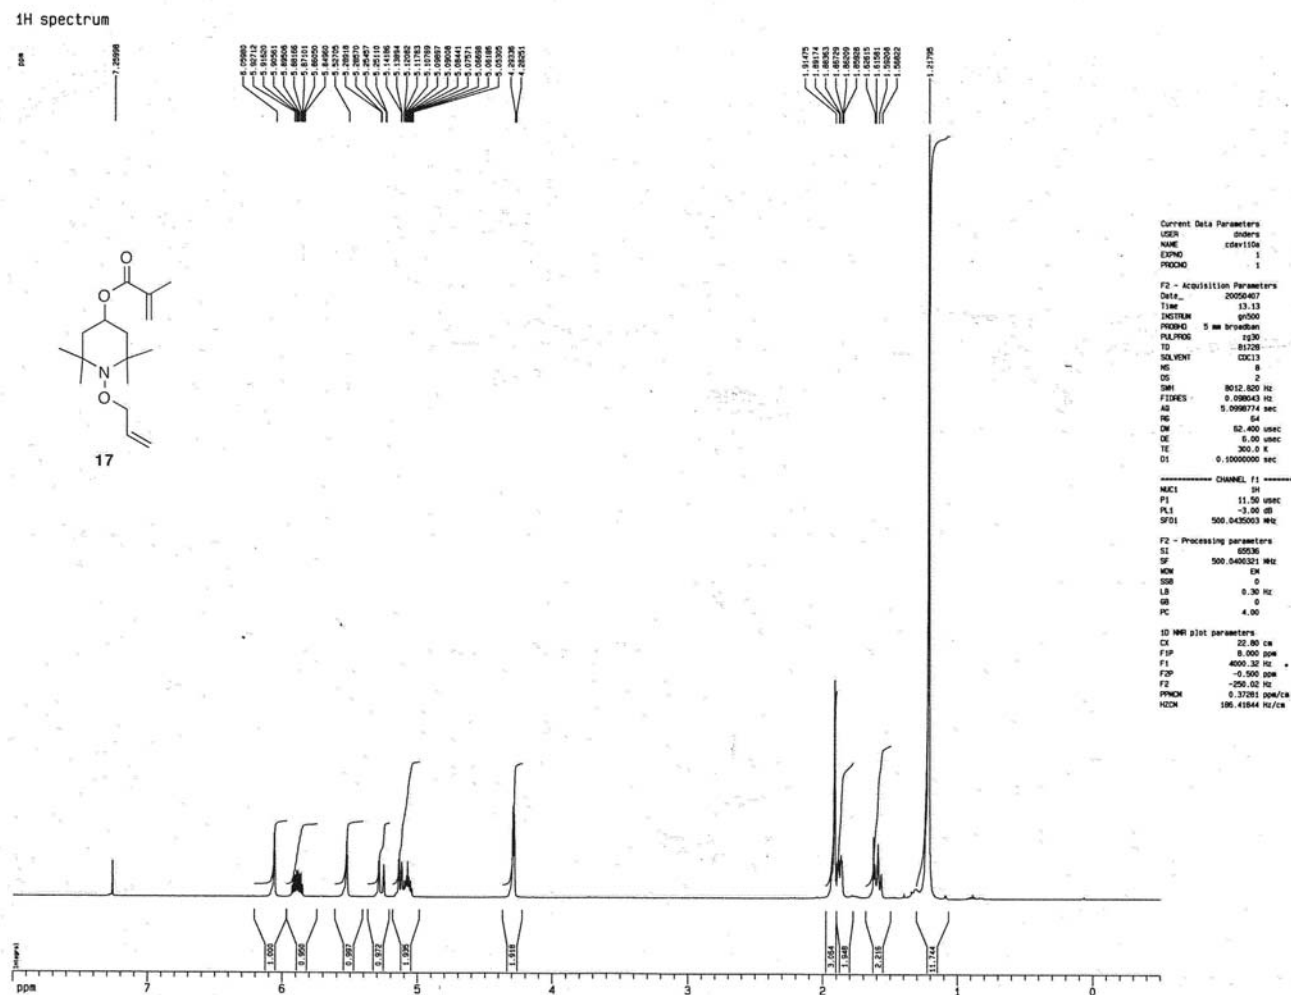

<sup>13</sup>C spectrum with <sup>1</sup>H decoupling

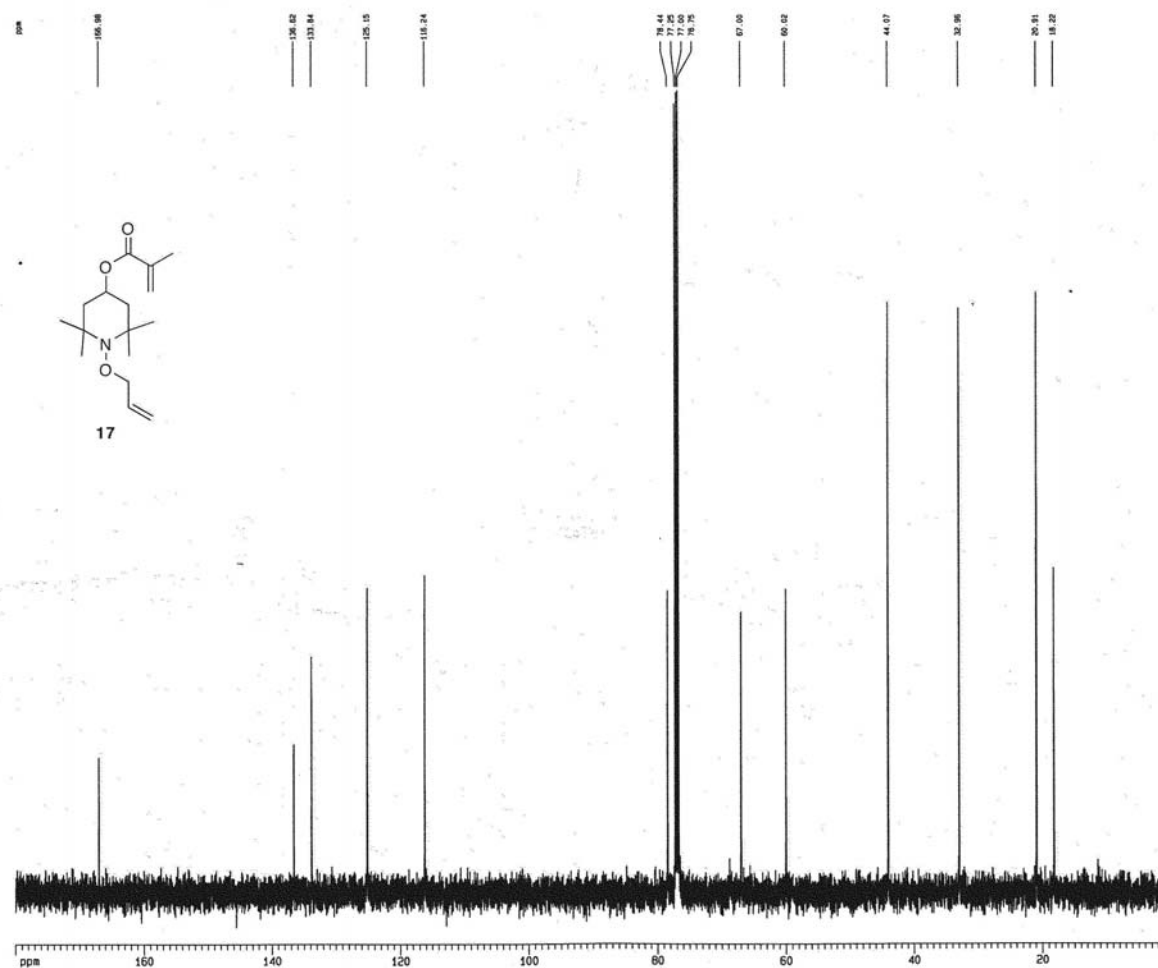

Current Data Parameters  
USER anders  
NAME cdev1504  
EXPNO 2  
PROCNO 1

F2 - Acquisition Parameters  
Date\_ 20090407  
Time 13.15  
INSTRUM spect  
PROBHD 5 mm broadband  
PULPROG zgpg30  
TD 65536  
SOLVENT CDCl3  
NS 132  
DS 4  
SWH 30363.031 Hz  
FIDRES 0.462388 Hz  
AQ 1.0813640 sec  
RG 2566.3  
DM 15.500 usec  
DE 4.50 usec  
TE 300.2 K  
D1 0.25000000 sec  
D11 0.03000000 sec

===== CHANNEL f1 =====  
NUC1 <sup>13</sup>C  
P1 6.80 usec  
PL1 0.00 dB  
SFO1 125.7485000 MHz

===== CHANNEL f2 =====  
CPDPRG2 waltz16  
NUC2 <sup>1</sup>H  
P2 80.00 usec  
PL2 -3.00 dB  
PL12 15.40 dB  
SFO2 500.6420002 MHz

F2 - Processing parameters  
SI 65536  
SF 125.7351665 MHz  
WDW EM  
SSB 0  
LB 1.00 Hz  
GB 0  
PC 2.00

1D NMR plot parameters  
CX 22.80 cm  
FAP 180.000 ppm  
F1 200.32.33 Hz  
F2 0.000 ppm  
PRNCH 7.85474 ppm/cm  
H2CH 992.54512 Hz/cm

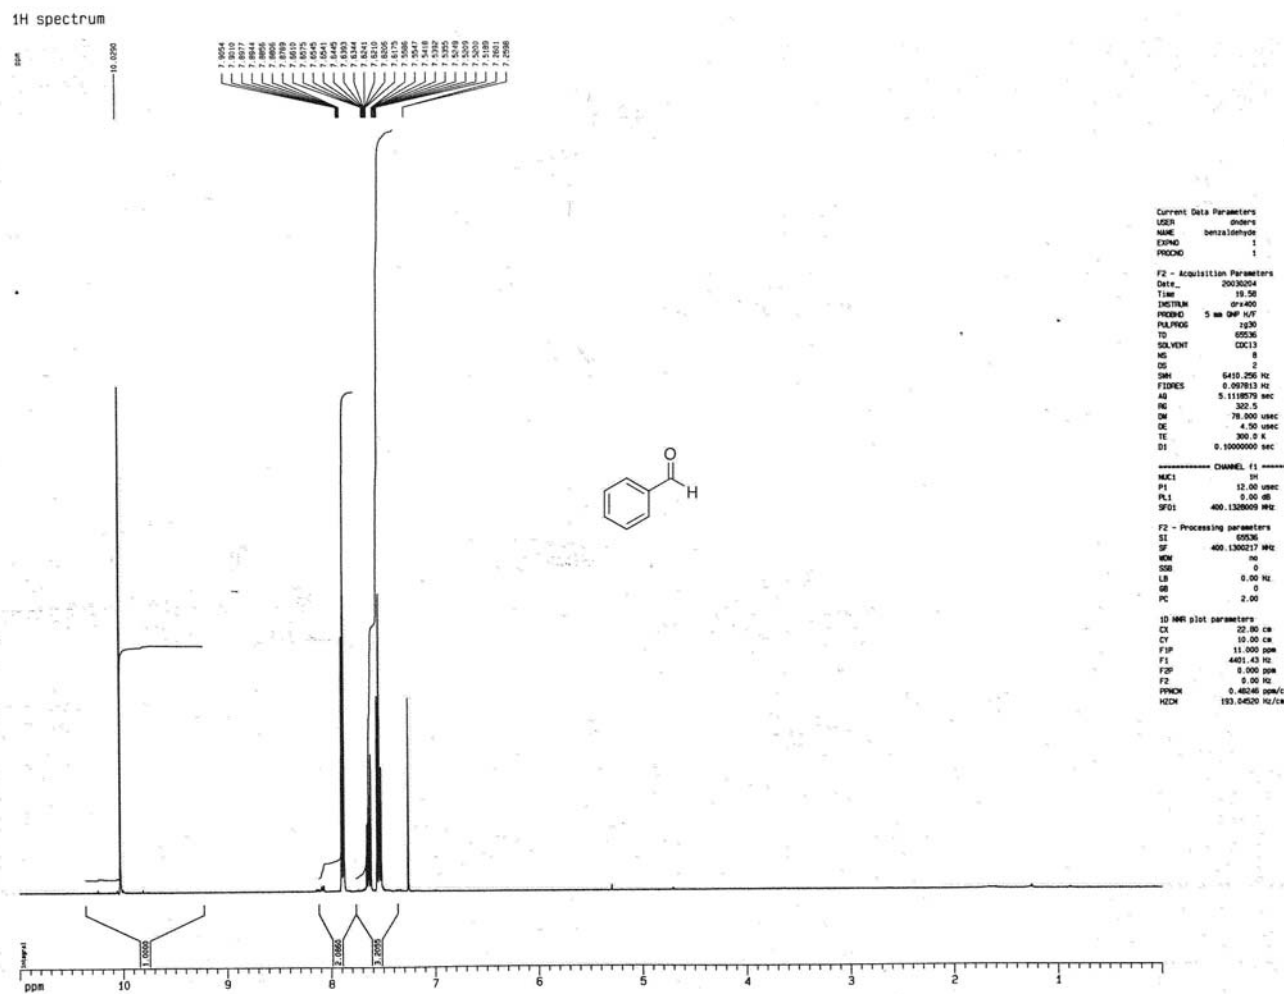



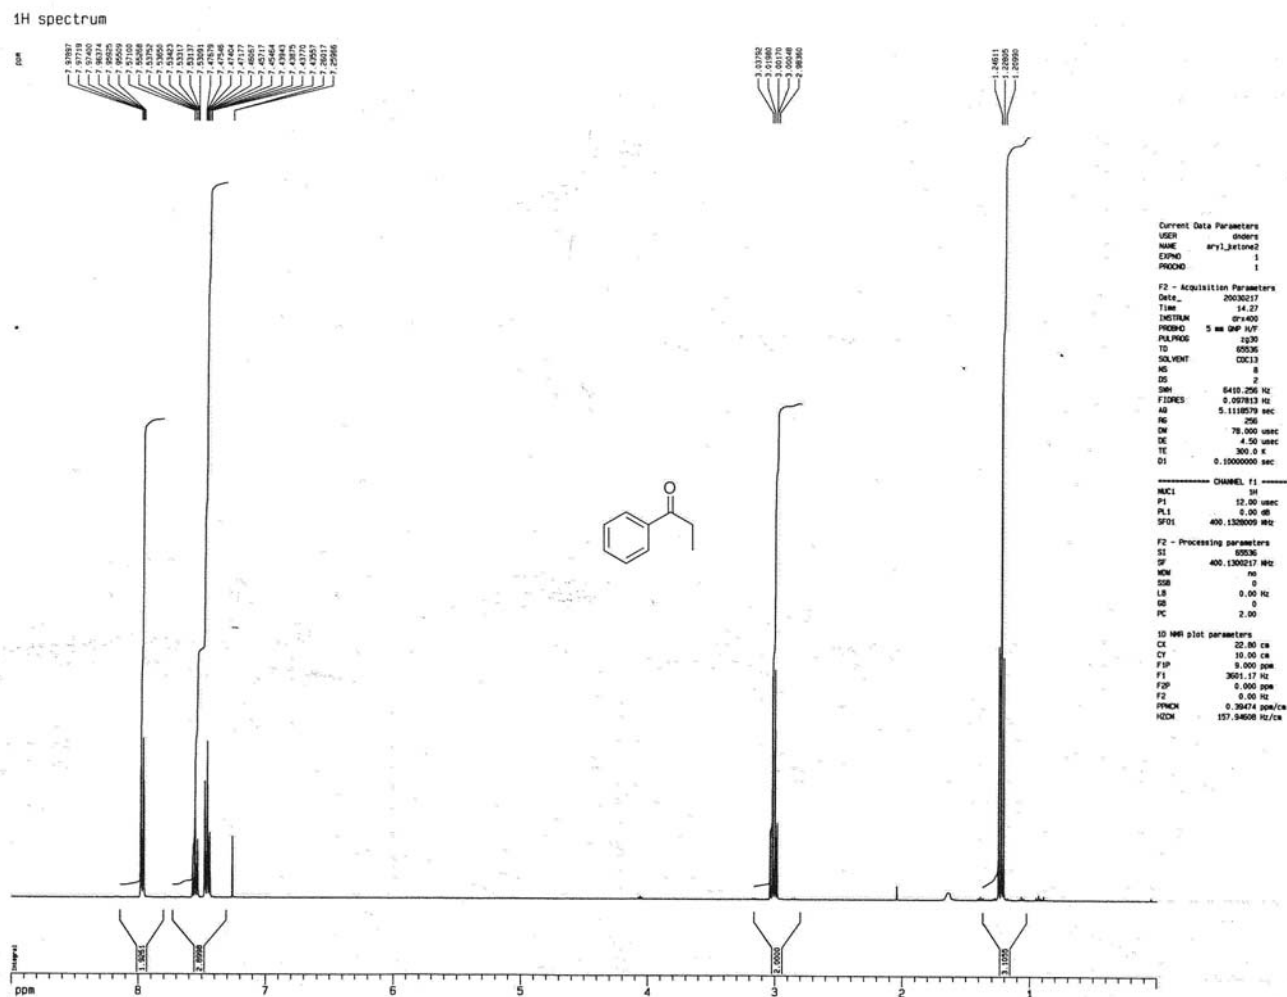

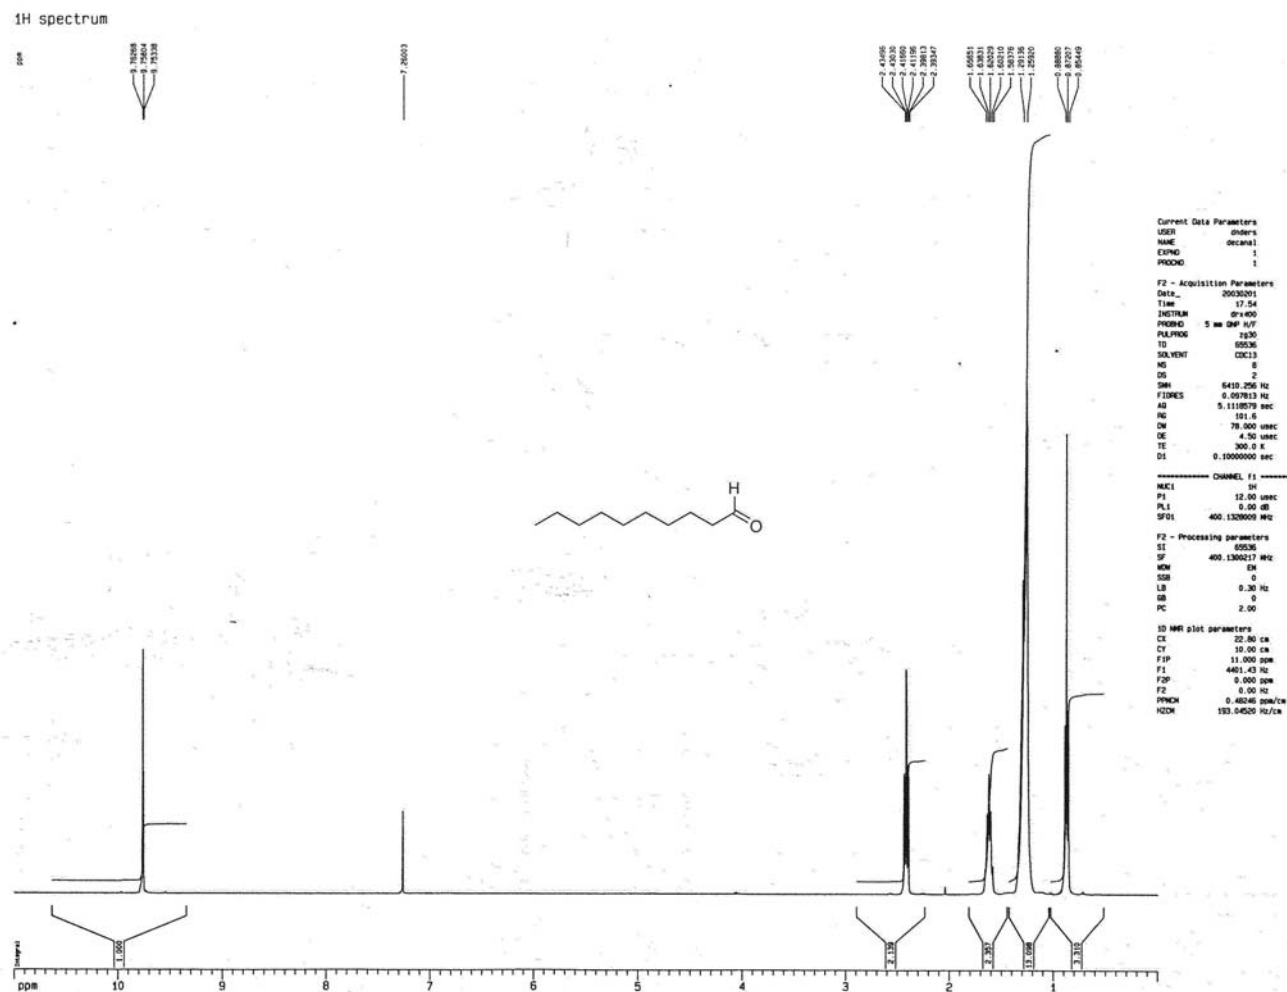

1H spectrum

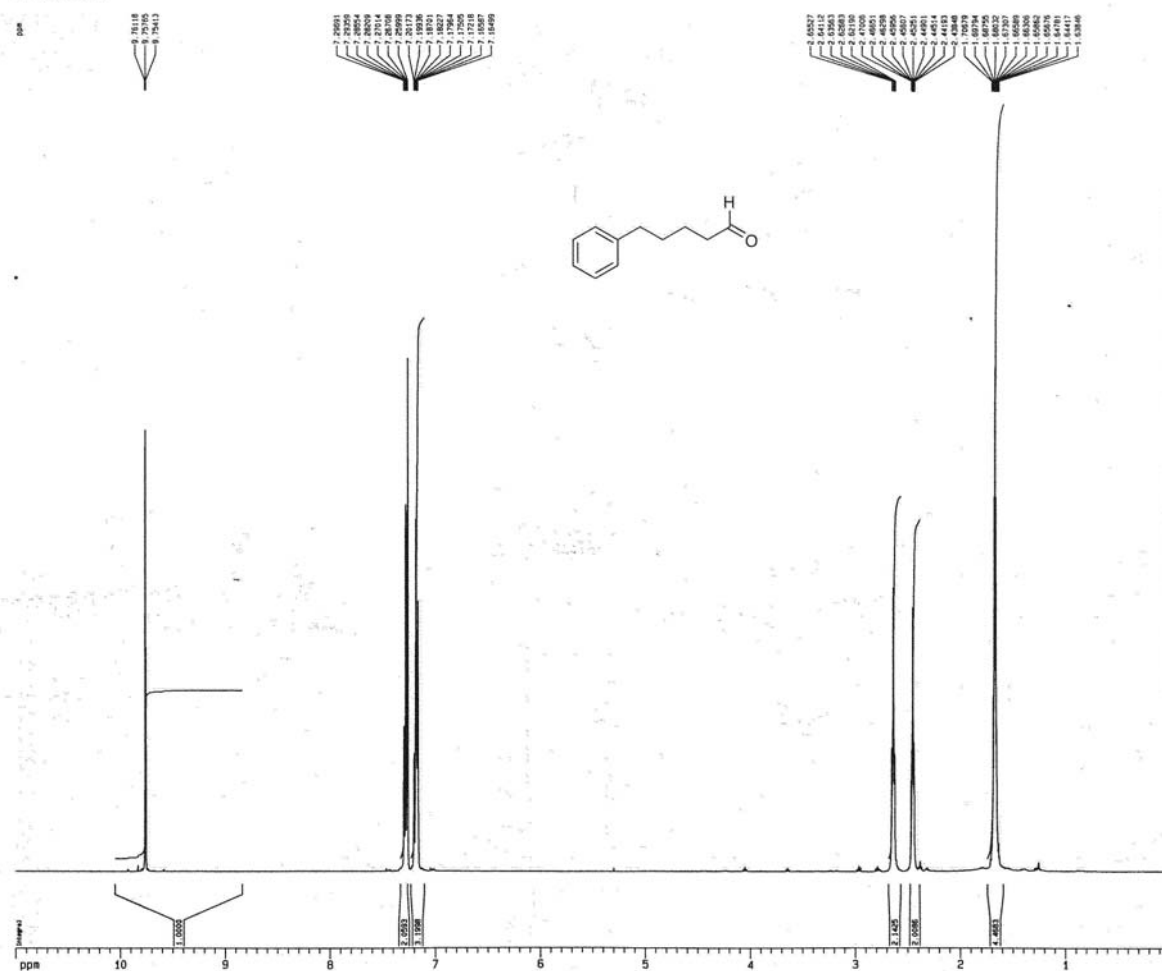

Current Data Parameters  
USER anders  
NAME clev550  
EXPNO 1  
PROCNO 1

F2 - Acquisition Parameters  
Date\_ 20090804  
Time 14.30  
INSTRUM crys000  
PROBHD 5 mm CPTCI 1H-  
PULPROG zg30  
TD 65536  
SOLVENT CDCl3  
NS 8  
DS 2  
SWH 8612.820 Hz  
FIDRES 0.098443 Hz  
AQ 5.0998774 sec  
RG 65.5  
CW 62.400 usec  
DE 6.00 usec  
TE 298.2 K  
D1 0.10000000 sec  
ACQRES 0.00000000 sec  
MCW 0.01500000 sec

===== CHANNEL f1 =====  
NUC1 1H  
P1 8.00 usec  
PL1 1.00 dB  
SFO1 500.213015 MHz

F2 - Processing parameters  
SI 32768  
SF 500.213015 MHz  
WDW EM  
SSB 0  
LB 0.30 Hz  
GB 0  
PC 4.00

1D NMR plot parameters  
CX 22.80 cm  
CY 10.00 cm  
FIP 11.000 ppm  
F1 5002.11 Hz  
F2 0.000 ppm  
F3 0.00 Hz  
PCH 0.40046 ppm/cx  
HCH 241.32041 Hz/cx

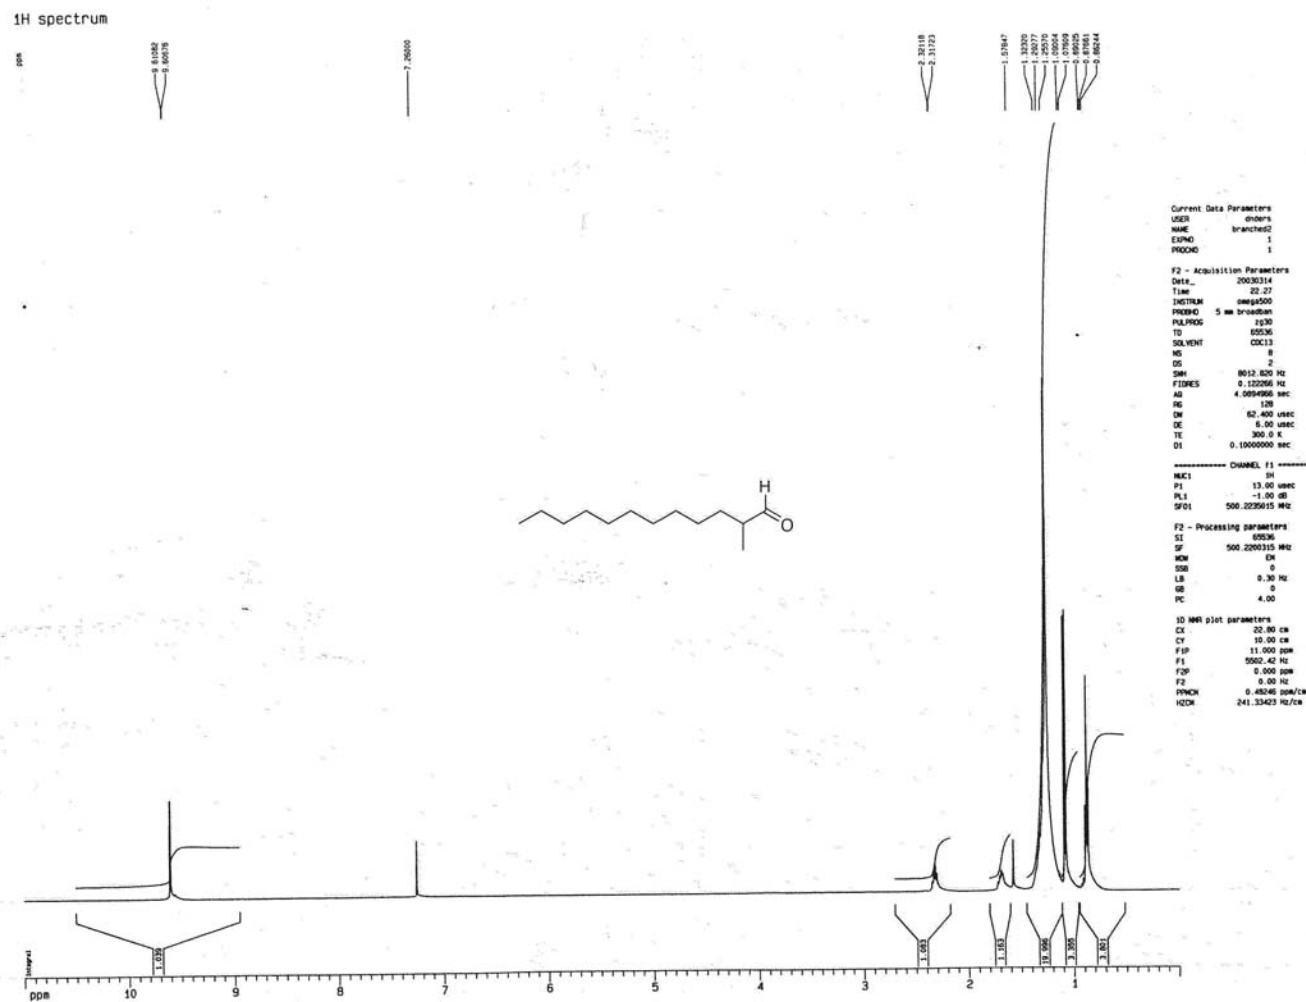

Supplement: Supplementary file 1 [file 5098588]
